# Supplementary material
Source: PubMed Central journal article supplement (PMC8405189)

## **Supplementary Methods**

### **Sequencing Method**

An optimised and standardised protocol was followed by all testing centres. All samples underwent a buffer exchange using a Zymo Research DNA & Concentrator kit (Zymo Research, Tustin, Ca, USA). Whole genome shotgun library preparation was performed from 100 ng HMW or 200 ng FFPE gDNA using the KAPA Hyperplus kit (Roche Sequencing Solutions, Pleasanton, CA, US). Points in the protocol which were optimised included, fragmentation conditions of 37°C for 20 min, inclusion of a dual size selection step to enable retention of library molecules between 250-450 bp and 6 cycles of pre-hybridization PCR cycles. Including the negative and positive controls, 16 and 24 libraries were pooled for the proficiency and validation runs, respectively, followed by hybrid capture selected using the custom designed SeqCap EZ Choice Library (Roche Sequencing Solutions, Pleasanton, CA, US). For hybridization a total of 1 µg of pooled libraries were utilised which equated to 71.4 ng and 45.5 ng for each proficiency and validation sample library respectively. To remove bias during hybridisation arising from variability in DNA integrity, HMW and FFPE samples were pooled and hybridised on separate runs. Eleven cycles of post-hybridization PCR were performed prior to final enriched pooled libraries being sequenced on the NextSeq 500 (Illumina, Cambridge, UK) using a 150bp paired-end strategy performed on a 300-cycle NextSeq 500/550 Mid Output Kit (Illumina, Cambridge, UK). An in-silico analysis was performed of different read lengths (75 and 100bp pair-end reads) and the reporting of rearrangements using the EuroClonality-NDC assay was found to be remarkably stable throughout the cohort of 270 samples (manuscript in preparation).

### **ARResT/Interrogate pipeline**

For both rearrangements and Structural Variant (SV) detection reads were paired-end joined using flash2, and for those without overlapping sequence, we concatenated the R1 and R2 reads into one sequence using a 12-N spacer<sup>1</sup>. No quality trimming was performed to be able to evaluate duplicated fragments downstream. Identical reads were deduplicated irrespective of orientation.

### **Bioinformatic Pipeline - Rearrangement Detection**

Reads were aligned to IG/TCR germline genes and V gene recombination signal sequences (RSS) with minimap2<sup>2</sup>. A subset of reads that aligned to the IG/TCR germline genes and not RSS motifs were extracted using seqtk subseq and retained for further analysis. Firstly, reads with the same junction or informative junction fragments were grouped and deduplicated based on strict clustering using the vsearch tool with a 98% cut off<sup>3</sup>. Clustered reads were then used to create contigs using the kmer based assembler, tadpole, from the BBMap program to maximise the quality and length of the

available sequence information. Secondly, the contigs were then used for a second round of finding rearrangements to finalise and improve the immunogenetic annotation. Finally, the rearrangement contig sequences were aligned to the genome [bwa mem, samtools] to detect false positive events (e.g. if the complete contig aligned to a contiguous genomic region, even with alignment breaks or other artefacts) or in fact confirm them (if the annotations of the aligned genomic coordinates matched the rearranged genes). A simplified version of the rearrangement results which formed part of the integrated report used for the study is shown below.

| sample | in FASTQs <sup>a</sup> | Unique <sup>b</sup> | Usable <sup>c</sup> | locus | Class <sup>d</sup> | Event <sup>e</sup>         | Frag <sup>f</sup> | % in locus <sup>g</sup> | % in class <sup>h</sup> |
|--------|------------------------|---------------------|---------------------|-------|--------------------|----------------------------|-------------------|-------------------------|-------------------------|
| Ex_1   | 7544400                | 170529              | 1502                | TRB   | R VJ:Vb-(Db)-Jb    | V4-2 J2-7<br>CASSQDGVNEQYF | 212               | 31.6                    | 32.1                    |
| Ex_1   | 7544400                | 170529              | 1502                | TRB   | R VJ:Vb-(Db)-Jb    | V30 J2-7<br>CAWSAYREAL#F   | 182               | 27.2                    | 27.5                    |
| Ex_1   | 7544400                | 170529              | 1502                | TRB   | R VJ:Vb-(Db)-Jb    | V20-1 J1-1<br>CSARWVNTEAFF | 165               | 24.6                    | 25                      |
| Ex_1   | 7544400                | 170529              | 1502                | TRG   | R VJ:Vg-Jg         | V2 J2<br>CATWDYKCLF        | 225               | 57                      | 57                      |
| Ex_1   | 7544400                | 170529              | 1502                | TRG   | R VJ:Vg-Jg         | V3 J2<br>CATWDRPGG#F       | 113               | 28.6                    | 28.6                    |

<sup>a</sup> Number of reads within the fastq file

<sup>b</sup> Number of IG/TCR reads following deduplication

<sup>c</sup> Number of reads which contained a rearrangement junction and were classed as usable

<sup>d</sup> Description of the class of the identified rearrangement

<sup>e</sup> Detail of the gene involved in the rearrangement and the subsequent CDR3 sequence

<sup>f</sup> Number of fragments which had the same number

<sup>g</sup> Percentage in locus was calculated by determining the number of fragments for the specific rearrangement detailed and dividing it by the total number of fragments for rearrangements identified for that specific loci

<sup>h</sup> Percentage in class was calculated by determining the number of fragments for the specific rearrangement and dividing it by the total number of fragments for the specific class of rearrangement within that loci.

### Bioinformatic Pipeline - Translocation Detection

We created target sequences from the panel's BED file and the human genome, padded by 150bp in both directions [bedtools] to avoid missed alignments<sup>4</sup>. Reads were aligned to these target sequences [minimap2, samtools], and alignments kept if mapQ > 0<sup>2,5</sup>. Alignments needed to be soft-clipped (and the soft-clip of a minimum length of 30bp) and span two IG/TCR gene segments, with a minimum identity of 98% (or 90% in case of potential IG/TCR rearrangements). All potential breakpoints were calculated. Similar to rearrangements, reads with the same (or close-neighbouring) breakpoint were

grouped and deduplicated based on strict clustering [vsearch 98%], then used to create contigs [bbmap's tadpole] to maximise the quality and length of the available sequence information. The translocation contig sequences were aligned to the genome [minimap2, samtools] and the process described above for breakpoint detection is repeated. This allowed the identification of all translocation partners. Again, similar to rearrangements, a function of this alignment to the genome was to detect false positive events. The breakpoint coordinates were also used to identify reads supporting germline configurations of the partner loci, towards an approximation of event coverage. Often, a detected translocation was in fact a rearrangement, in which case the event was annotated as such and tagged as SV-R. A simplified version of the translocation results which formed part of the integrated report used for the study is shown below.

| sample | in FASTQs <sup>a</sup> | unique <sup>b</sup> | usable <sup>c</sup> | locus | class <sup>d</sup> | event <sup>e</sup>                                     | Frag <sup>f</sup> | % in locus <sup>g</sup> | % in class <sup>h</sup> |
|--------|------------------------|---------------------|---------------------|-------|--------------------|--------------------------------------------------------|-------------------|-------------------------|-------------------------|
| Ex_2   | 7519784                | 113011              | 1399                | misc  | SV transloc        | IGHJ6 / CCND1<br>14:105,863,241- /<br>11:69,623,982-   | 219               | 99.9                    | 99.9                    |
| Ex_2   | 7519784                | 113011              | 1399                | misc  | SV transloc        | CCND1 / IGHD3-9<br>11:69,623,989- /<br>14:105,904,683- | 116               | 99.9                    | 99.9                    |

<sup>a</sup> Number of reads within the fastq file

<sup>b</sup> Number of IG/TCR reads following deduplication

<sup>c</sup> Number of reads which contained a rearrangement junction was a rearrangement parameter

<sup>d</sup> Description of the structural variant, which for translocations were labelled 'SV transloc'

<sup>e</sup> Detail of the genes involved in the translocations and chromosomal coordinates of the breakpoint

<sup>f</sup> Number of fragments which had the same number

<sup>g</sup> Percentage in locus was a rearrangement parameter and was set as an arbitrary figure of 99.9 for translocations

<sup>h</sup> Percentage in class was a rearrangement parameter and was set as an arbitrary figure of 99.9 for translocations

### Bioinformatic Pipeline - Copy Number Variation Detection

FASTQ files were aligned to the human reference genome (GRCh38/hg38) using Burrow-Wheeler Aligner (bwa, v0.7.17) following which Samtools (v4.0.12.0) was used for sorting, merging and filtering the bam files generated by bwa<sup>5,6</sup>. GATK4's (v 4.0.12) picard was used to sort, mark and remove the duplicated reads<sup>7</sup>. The aligned bam files for all the samples were then normalized using TSS (total sum scaling) using Bioconductor package CNVPanelizer<sup>8</sup>. The normalized samples with a coverage of at least 250X were used as group of reference samples against all the tumour samples. An average value of all the normal samples for each region in bed file was then calculated. Thereafter, the copy number variation is calculated as a ratio between individual tumour sample and mean value of normal samples for each region included in the bed file. Samples with a high level of aneuploidy (defined by  $\geq 40$  regions showing amplification or deletion across all regions on the bed file) were excluded (8 out of 280 samples [2.8%]) from analysis. CNVPanelizer used a threshold of 0.8 and 1.2 to classify a region

as either exhibiting either loss or gain of DNA copy number respectively. Analysis of IG/TCR rearrangements using CNA data was performed as above with verification of results using manual curation.

### **Bioinformatic Pipeline - Somatic Mutation Detection**

All sequencing reads were aligned to human reference sequence (GRCh38), using the BWA (v0.7.15) MEM algorithm to generate SAM files<sup>6</sup>. SAMtools (v1.9) was used to convert the SAM files to BAM files, to remove reads with low mapping quality (MQ < 30) and to merge files from the same cell<sup>5</sup>. Picard tools (v2.6.0)<sup>3</sup> was used to sort the BAM files by chromosome coordinates, to mark/remove PCR duplicates, and to calculate the sequencing metrics. Variant calls were obtained using Vardict (v1.6) with tumour sample only mode<sup>9</sup>. Two sets of normal sample datasets were generated using the DNA materials from HMW and FFPE tissue types which were termed the pool of normal (PON) samples. To generate the initial high-confidence set of variant calls, any variants were removed with any of following conditions: (i) If the variant allele frequency was below 4%, (ii) were not within the coding sequence or splice site, (iii) the median variant allele frequency (VAF) is  $\geq 20\%$  in the HMW or FFPE PON samples at the same chromosomal coordinate, (iv) if  $\geq 4$  samples of the HMW PON samples or  $\geq 2$  samples of the FFPE PON samples had a VAF > 0 at the same chromosomal coordinate. The R Bioconductor package, Maftools, was used to create oncoplots detailing the most frequently mutated genes by disease entity in the validation cohort<sup>10</sup>. Using the Horizon cell line blends, with VAFs ranging from 4-30%, which were sequenced in triplicate we determined the LOD for SNV and indel calling to be 4% using our previously published methodology<sup>11</sup>.

### **Supplementary References**

1. Magoc T, Salzberg SL. FLASH: fast length adjustment of short reads to improve genome assemblies. *Bioinformatics*. 2011;27(21):2957-2963.
2. Li H. Minimap2: pairwise alignment for nucleotide sequences. *Bioinformatics*. 2018;34(18):3094-3100.
3. Rognes T, Flouri T, Nichols B, Quince C, Mahe F. VSEARCH: a versatile open source tool for metagenomics. *PeerJ*. 2016;4:e2584.
4. Quinlan AR, Hall IM. BEDTools: a flexible suite of utilities for comparing genomic features. *Bioinformatics*. 2010;26(6):841-842.
5. Li H, Handsaker B, Wysoker A, et al. The Sequence Alignment/Map format and SAMtools. *Bioinformatics*. 2009;25(16):2078-2079.
6. Li H, Durbin R. Fast and accurate short read alignment with Burrows-Wheeler transform. *Bioinformatics*. 2009;25(14):1754-1760.
7. McKenna A, Hanna M, Banks E, et al. The Genome Analysis Toolkit: a MapReduce framework for analyzing next-generation DNA sequencing data. *Genome Res*. 2010;20(9):1297-1303.
8. Oliveira C, Wolf T. CNVPanelizer: Reliable CNV detection in targeted sequencing applications. Vol. R package version 1.18.0.

<https://bioconductor.org/packages/release/bioc/vignettes/CNVPanelizer/inst/doc/CNVPanelizer.pdf>: Bioconductor; 2019.

9. Lai Z, Markovets A, Ahdesmaki M, et al. VarDict: a novel and versatile variant caller for next-generation sequencing in cancer research. *Nucleic Acids Res.* 2016;44(11):e108.
10. Mayakonda A, Lin DC, Assenov Y, Plass C, Koeffler HP. Maftools: efficient and comprehensive analysis of somatic variants in cancer. *Genome Res.* 2018;28(11):1747-1756.
11. Izquierdo E, Yuan L, George S, et al. Development of a targeted sequencing approach to identify prognostic, predictive and diagnostic markers in paediatric solid tumours. *Oncotarget.* 2017;8(67):112036-112050.

## **Supplementary Tables**

**Table S1 Description of reactive lesions**

| <b>Sample ID</b> | <b>Diagnosis</b>         |
|------------------|--------------------------|
| GMS1795          | Chronic tonsillitis      |
| GMS1796          | Chronic tonsillitis      |
| GMS1797          | Chronic tonsillitis      |
| GMS1798          | Chronic tonsillitis      |
| GMS1799          | Reactive lymph node, NOS |
| GMS1801          | Chronic tonsillitis      |
| GMS1802          | Chronic tonsillitis      |
| GMS1803          | Chronic tonsillitis      |
| GMS1804          | Chronic tonsillitis      |
| GMS1805          | Chronic tonsillitis      |
| GMS1806          | Chronic tonsillitis      |
| GMS1807          | Chronic tonsillitis      |
| GMS1808          | Chronic tonsillitis      |
| GMS1809          | Chronic tonsillitis      |
| GMS1810          | Chronic tonsillitis      |
| GMS1811          | Chronic tonsillitis      |
| GMS1812          | Chronic tonsillitis      |
| GMS1813          | Reactive lymph node, NOS |
| GMS1814          | Chronic tonsillitis      |
| GMS1815          | Chronic tonsillitis      |
| GMS1816          | Chronic tonsillitis      |

**Table S2 Description of cell lines used in the study**

| <b>Cell Line</b> | <b>B / T cell</b> | <b>Disease Subtype</b> | <b>ATCC</b> | <b>DSMZ</b> | <b>ExPASy</b> |
|------------------|-------------------|------------------------|-------------|-------------|---------------|
| ARR              | T                 | T-ALL                  | No          | No          | CVCL_WV44     |
| CA 46            | B                 | BL                     | CRL-1648    | ACC 73      | CVCL_1101     |
| CML-T1           | T                 | T-ALL                  | No          | ACC 7       | CVCL_1126     |
| H929             | B                 | MM                     | CRL-9068    | ACC 163     | CVCL_1600     |
| HAL-01           | B                 | B-ALL                  | No          | ACC 610     | CVCL_1242     |
| KCA              | B                 | B-ALL                  | No          | No          | No            |
| Loucy            | T                 | T-ALL                  | CRL-2629    | ACC 394     | CVCL_1380     |

|              |   |       |          |         |           |
|--------------|---|-------|----------|---------|-----------|
| P12-Ichikawa | T | T-ALL | No       | ACC 34  | CVCL_1630 |
| K-T1         | T | T-ALL | No       | No      | CVCL_F690 |
| KARPAS299    | T | ALCL  | No       | No      | CVCL_1324 |
| Namalwa      | B | BL    | CRL-1432 | ACC 24  | CVCL_0067 |
| REH          | B | B-ALL | CRL-8286 | ACC 22  | CVCL_1650 |
| RS4          | B | B-ALL | CRL-1873 | ACC 508 | CVCL_0093 |
| TOM-1        | B | B-ALL | No       | ACC 578 | CVCL_1895 |

**Table S3 Description of samples with Southern blot data used in study**

| Sample ID | Disease Subtype         |
|-----------|-------------------------|
| DE-9      | B-ALL                   |
| DE-6      | CLL                     |
| DE-7      | CLL                     |
| ES-1      | CLL                     |
| ES-2      | CLL                     |
| FR-3      | CLL                     |
| GBN-10    | CLL                     |
| GBS-2     | CLL                     |
| GBS-3     | CLL                     |
| NL-10     | CLL                     |
| NL-11     | CLL                     |
| ES-5      | DLBCL                   |
| FR-6      | DLBCL                   |
| GBN-4     | DLBCL                   |
| GBS-16    | DLBCL                   |
| NL-6      | DLBCL                   |
| PT-11     | DLBCL                   |
| PT-13     | DLBCL                   |
| ES-7      | FCL                     |
| FR-8      | FCL                     |
| GBN-3     | FCL                     |
| NL-4      | FCL                     |
| PT-7      | FCL                     |
| PT-8      | FCL                     |
| ES-4      | MCL                     |
| GBS-1     | MCL                     |
| GBS-17    | MCL                     |
| NL-15     | MCL                     |
| PT-10     | MCL                     |
| NL-17     | MF                      |
| ES-8      | MM_PCL                  |
| NL-12     | MM_PCL                  |
| ES-14     | Normal Peripheral Blood |
| PT-2      | Normal Peripheral Blood |
| FR-10     | PTCL                    |
| GBN-1     | PTCL                    |
| GBN-5     | PTCL                    |
| NL-18     | PTCL                    |
| PT-3      | PTCL                    |
| DE-5      | Reactive lymph node     |
| GBN-9     | Reactive lymph node     |
| PT-1      | Reactive lymph node     |
| ES-11     | Reactive tonsil         |

|        |                 |
|--------|-----------------|
| GBS-11 | Reactive tonsil |
| NL-7   | Reactive tonsil |
| DE-1   | T-ALL           |
| DE-10  | T-ALL           |
| FR-12  | T-ALL           |
| ES-9   | T-LBL           |
| GBS-15 | T-PLL           |

**Table S4.1 List of IGH Genes on Panel**

| <b>IGH Locus</b> | <b>Chromosome</b> | <b>V Gene</b> | <b>D Gene</b> | <b>J Gene</b> |
|------------------|-------------------|---------------|---------------|---------------|
| IGH              | chr14             | IGHV6-1       | IGHD1-26      | IGHJ1         |
| IGH              | chr14             | IGHV1-2       | IGHD6-25      | IGHJ2         |
| IGH              | chr14             | IGHV1-3       | IGHD5-24      | IGHJ3         |
| IGH              | chr14             | IGHV4-4       | IGHD4-23      | IGHJ4         |
| IGH              | chr14             | IGHV7-4-1     | IGHD3-22      | IGHJ5         |
| IGH              | chr14             | IGHV2-5       | IGHD2-21      | IGHJ6         |
| IGH              | chr14             | IGHV3-7       | IGHD1-20      |               |
| IGH              | chr14             | IGHV1-8       | IGHD6-19      |               |
| IGH              | chr14             | IGHV3-9       | IGHD5-18      |               |
| IGH              | chr14             | IGHV3-11      | IGHD4-17      |               |
| IGH              | chr14             | IGHV3-13      | IGHD3-16      |               |
| IGH              | chr14             | IGHV3-15      | IGHD2-15      |               |
| IGH              | chr14             | IGHV3-16      | IGHD1-14      |               |
| IGH              | chr14             | IGHV1-18      | IGHD6-13      |               |
| IGH              | chr14             | IGHV3-20      | IGHD5-12      |               |
| IGH              | chr14             | IGHV3-21      | IGHD4-11      |               |
| IGH              | chr14             | IGHV3-23      | IGHD3-10      |               |
| IGH              | chr14             | IGHV1-24      | IGHD3-9       |               |
| IGH              | chr14             | IGHV3-25      | IGHD2-8       |               |
| IGH              | chr14             | IGHV2-26      | IGHD1-7       |               |
| IGH              | chr14             | IGHV4-28      | IGHD6-6       |               |
| IGH              | chr14             | IGHV3-30      | IGHD5-5       |               |
| IGH              | chr14             | IGHV4-31      | IGHD4-4       |               |
| IGH              | chr14             | IGHV3-33      | IGHD3-3       |               |
| IGH              | chr14             | IGHV4-34      | IGHD2-2       |               |
| IGH              | chr14             | IGHV3-35      | IGHD1-1       |               |
| IGH              | chr14             | IGHV3-38      |               |               |
| IGH              | chr14             | IGHV4-39      |               |               |
| IGH              | chr14             | IGHV3-43      |               |               |
| IGH              | chr14             | IGHV1-45      |               |               |
| IGH              | chr14             | IGHV1-46      |               |               |
| IGH              | chr14             | IGHV3-48      |               |               |
| IGH              | chr14             | IGHV3-49      |               |               |
| IGH              | chr14             | IGHV5-51      |               |               |
| IGH              | chr14             | IGHV3-53      |               |               |

|     |       |          |  |  |
|-----|-------|----------|--|--|
| IGH | chr14 | IGHV1-58 |  |  |
| IGH | chr14 | IGHV4-59 |  |  |
| IGH | chr14 | IGHV4-61 |  |  |
| IGH | chr14 | IGHV3-64 |  |  |
| IGH | chr14 | IGHV3-66 |  |  |
| IGH | chr14 | IGHV1-69 |  |  |
| IGH | chr14 | IGHV2-70 |  |  |
| IGH | chr14 | IGHV3-72 |  |  |
| IGH | chr14 | IGHV3-73 |  |  |
| IGH | chr14 | IGHV3-74 |  |  |
| IGH | chr14 | IGHV7-81 |  |  |

**Table S4.2 List of IGK Genes on Panel**

| IG Locus | Chromosome | V Gene   | J Gene | Misc      |
|----------|------------|----------|--------|-----------|
| IGK      | chr2       | IGKV4-1  | IGKJ1  | Kde       |
| IGK      | chr2       | IGKV5-2  | IGKJ2  | IntronRSS |
| IGK      | chr2       | IGKV1-5  | IGKJ3  |           |
| IGK      | chr2       | IGKV1-6  | IGKJ4  |           |
| IGK      | chr2       | IGKV3-7  | IGKJ5  |           |
| IGK      | chr2       | IGKV1-8  |        |           |
| IGK      | chr2       | IGKV1-9  |        |           |
| IGK      | chr2       | IGKV3-11 |        |           |
| IGK      | chr2       | IGKV1-12 |        |           |
| IGK      | chr2       | IGKV1-13 |        |           |
| IGK      | chr2       | IGKV3-15 |        |           |
| IGK      | chr2       | IGKV1-16 |        |           |
| IGK      | chr2       | IGKV1-17 |        |           |
| IGK      | chr2       | IGKV3-20 |        |           |
| IGK      | chr2       | IGKV6-21 |        |           |
| IGK      | chr2       | IGKV2-24 |        |           |
| IGK      | chr2       | IGKV1-27 |        |           |
| IGK      | chr2       | IGKV2-28 |        |           |
| IGK      | chr2       | IGKV2-29 |        |           |
| IGK      | chr2       | IGKV2-30 |        |           |
| IGK      | chr2       | IGKV1-33 |        |           |
| IGK      | chr2       | IGKV1-37 |        |           |
| IGK      | chr2       | IGKV1-39 |        |           |
| IGK      | chr2       | IGKV2-40 |        |           |

**Table S4.3 List of IGL Genes on Panel**

| IG Locus | Chromosome | V Gene    | J Gene |
|----------|------------|-----------|--------|
| IGL      | chr22      | IGLV4-69  | IGLJ1  |
| IGL      | chr22      | IGLV8-61  | IGLJ2  |
| IGL      | chr22      | IGLV4-60  | IGLJ3  |
| IGL      | chr22      | IGLV6-57  | IGLJ4  |
| IGL      | chr22      | IGLV11-55 | IGLJ5  |
| IGL      | chr22      | IGLV10-54 | IGLJ6  |
| IGL      | chr22      | IGLVpreB  | IGLJ7  |



|     |       |          |  |
|-----|-------|----------|--|
| IGL | chr22 | IGLV5-52 |  |
| IGL | chr22 | IGLV1-51 |  |
| IGL | chr22 | IGLV1-50 |  |
| IGL | chr22 | IGLV9-49 |  |
| IGL | chr22 | IGLV5-48 |  |
| IGL | chr22 | IGLV1-47 |  |
| IGL | chr22 | IGLV7-46 |  |
| IGL | chr22 | IGLV5-45 |  |
| IGL | chr22 | IGLV1-44 |  |
| IGL | chr22 | IGLV7-43 |  |
| IGL | chr22 | IGLV1-41 |  |
| IGL | chr22 | IGLV1-40 |  |
| IGL | chr22 | IGLV5-37 |  |
| IGL | chr22 | IGLV1-36 |  |
| IGL | chr22 | IGLV7-35 |  |
| IGL | chr22 | IGLV2-34 |  |
| IGL | chr22 | IGLV2-33 |  |
| IGL | chr22 | IGLV3-32 |  |
| IGL | chr22 | IGLV3-27 |  |
| IGL | chr22 | IGLV3-26 |  |
| IGL | chr22 | IGLV3-25 |  |
| IGL | chr22 | IGLV2-23 |  |
| IGL | chr22 | IGLV3-22 |  |
| IGL | chr22 | IGLV3-21 |  |
| IGL | chr22 | IGLV3-19 |  |
| IGL | chr22 | IGLV2-18 |  |
| IGL | chr22 | IGLV3-16 |  |
| IGL | chr22 | IGLV2-14 |  |
| IGL | chr22 | IGLV3-12 |  |
| IGL | chr22 | IGLV2-11 |  |
| IGL | chr22 | IGLV3-10 |  |
| IGL | chr22 | IGLV3-9  |  |
| IGL | chr22 | IGLV2-8  |  |
| IGL | chr22 | IGLV4-3  |  |
| IGL | chr22 | IGLV3-1  |  |

**Table S4.4 List of TRA Genes on Panel**

| <b>TCR Locus</b> | <b>Chromosome</b> | <b>V Gene</b> | <b>J Gene</b> |
|------------------|-------------------|---------------|---------------|
| TRA              | chr14             | TRAV1-1       | TRAJ61        |
| TRA              | chr14             | TRAV1-2       | TRAJ59        |
| TRA              | chr14             | TRAV2         | TRAJ58        |
| TRA              | chr14             | TRAV3         | TRAJ57        |
| TRA              | chr14             | TRAV4         | TRAJ56        |
| TRA              | chr14             | TRAV5         | TRAJ54        |
| TRA              | chr14             | TRAV6         | TRAJ53        |
| TRA              | chr14             | TRAV7         | TRAJ52        |
| TRA              | chr14             | TRAV8-1       | TRAJ50        |

|     |       |             |        |
|-----|-------|-------------|--------|
| TRA | chr14 | TRAV9-1     | TRAJ49 |
| TRA | chr14 | TRAV10      | TRAJ48 |
| TRA | chr14 | TRAV12-1    | TRAJ47 |
| TRA | chr14 | TRAV8-2     | TRAJ46 |
| TRA | chr14 | TRAV8-3     | TRAJ45 |
| TRA | chr14 | TRAV13-1    | TRAJ44 |
| TRA | chr14 | TRAV12-2    | TRAJ43 |
| TRA | chr14 | TRAV8-4     | TRAJ42 |
| TRA | chr14 | TRAV13-2    | TRAJ41 |
| TRA | chr14 | TRAV14/DV4  | TRAJ40 |
| TRA | chr14 | TRAV9-2     | TRAJ39 |
| TRA | chr14 | TRAV12-3    | TRAJ38 |
| TRA | chr14 | TRAV8-6     | TRAJ37 |
| TRA | chr14 | TRAV16      | TRAJ36 |
| TRA | chr14 | TRAV17      | TRAJ35 |
| TRA | chr14 | TRAV18      | TRAJ34 |
| TRA | chr14 | TRAV19      | TRAJ33 |
| TRA | chr14 | TRAV20      | TRAJ32 |
| TRA | chr14 | TRAV21      | TRAJ31 |
| TRA | chr14 | TRAV22      | TRAJ30 |
| TRA | chr14 | TRAV23DV6   | TRAJ29 |
| TRA | chr14 | TRDV1       | TRAJ28 |
| TRA | chr14 | TRAV24      | TRAJ27 |
| TRA | chr14 | TRAV25      | TRAJ26 |
| TRA | chr14 | TRAV26-1    | TRAJ25 |
| TRA | chr14 | TRAV8-7     | TRAJ24 |
| TRA | chr14 | TRAV27      | TRAJ23 |
| TRA | chr14 | TRAV29DV5   | TRAJ22 |
| TRA | chr14 | TRAV30      | TRAJ21 |
| TRA | chr14 | TRAV26-2    | TRAJ20 |
| TRA | chr14 | TRAV34      | TRAJ19 |
| TRA | chr14 | TRAV35      | TRAJ18 |
| TRA | chr14 | TRAV36DV7   | TRAJ17 |
| TRA | chr14 | TRAV38-1    | TRAJ16 |
| TRA | chr14 | TRAV38-2DV8 | TRAJ15 |
| TRA | chr14 | TRAV39      | TRAJ14 |
| TRA | chr14 | TRAV40      | TRAJ13 |
| TRA | chr14 | TRAV41      | TRAJ12 |
| TRA | chr14 |             | TRAJ11 |
| TRA | chr14 |             | TRAJ10 |
| TRA | chr14 |             | TRAJ9  |
| TRA | chr14 |             | TRAJ8  |
| TRA | chr14 |             | TRAJ7  |
| TRA | chr14 |             | TRAJ6  |
| TRA | chr14 |             | TRAJ5  |

|     |       |  |       |
|-----|-------|--|-------|
| TRA | chr14 |  | TRAJ4 |
| TRA | chr14 |  | TRAJ3 |
| TRA | chr14 |  | TRAJ2 |
| TRA | chr14 |  | TRAJ1 |

**Table S4.5 List of TRD Genes on Panel**

| TCR Locus | Chromosome | V Gene | D Gene | J Gene |
|-----------|------------|--------|--------|--------|
| TRD       | chr14      | TRDV2  | TRDD1  | TRDJ1  |
| TRD       | chr14      | TRDV3  | TRDD2  | TRDJ4  |
| TRD       | chr14      |        | TRDD3  | TRDJ2  |
| TRD       | chr14      |        |        | TRDJ3  |

**Table S4.6 List of TRB Genes on Panel**

| TCR Locus | Chromosome | V Gene   | D Gene | J Gene  |
|-----------|------------|----------|--------|---------|
| TRB       | chr7       | TRBV2    | TRBD1  | TRBJ1-1 |
| TRB       | chr7       | TRBV3-1  | TRBD2  | TRBJ1-2 |
| TRB       | chr7       | TRBV4-1  |        | TRBJ1-3 |
| TRB       | chr7       | TRBV5-1  |        | TRBJ1-4 |
| TRB       | chr7       | TRBV6-1  |        | TRBJ1-5 |
| TRB       | chr7       | TRBV7-1  |        | TRBJ1-6 |
| TRB       | chr7       | TRBV4-2  |        | TRBJ2-1 |
| TRB       | chr7       | TRBV6-4  |        | TRBJ2-2 |
| TRB       | chr7       | TRBV7-3  |        | TRBJ2-3 |
| TRB       | chr7       | TRBV5-3  |        | TRBJ2-4 |
| TRB       | chr7       | TRBV9    |        | TRBJ2-5 |
| TRB       | chr7       | TRBV10-1 |        | TRBJ2-6 |
| TRB       | chr7       | TRBV11-1 |        | TRBJ2-7 |
| TRB       | chr7       | TRBV10-2 |        |         |
| TRB       | chr7       | TRBV6-5  |        |         |
| TRB       | chr7       | TRBV7-4  |        |         |
| TRB       | chr7       | TRBV5-4  |        |         |
| TRB       | chr7       | TRBV6-6  |        |         |
| TRB       | chr7       | TRBV5-5  |        |         |
| TRB       | chr7       | TRBV5-6  |        |         |
| TRB       | chr7       | TRBV6-7  |        |         |
| TRB       | chr7       | TRBV7-6  |        |         |
| TRB       | chr7       | TRBV6-8  |        |         |
| TRB       | chr7       | TRBV19   |        |         |
| TRB       | chr7       | TRBV20-1 |        |         |
| TRB       | chr7       | TRBV23-1 |        |         |
| TRB       | chr7       | TRBV24-1 |        |         |
| TRB       | chr7       | TRBV25-1 |        |         |
| TRB       | chr7       | TRBV27   |        |         |
| TRB       | chr7       | TRBV28   |        |         |
| TRB       | chr7       | TRBV29-1 |        |         |

|     |      |        |  |
|-----|------|--------|--|
| TRB | chr7 | TRBV30 |  |
|-----|------|--------|--|

**Table S4.7 List of TRG Genes on Panel**

| TCR Locus | Chromosome | V Gene | J Gene |
|-----------|------------|--------|--------|
| TRG       | chr7       | TRGV11 | TRGJ2  |
| TRG       | chr7       | TRGVB  | TRGJP2 |
| TRG       | chr7       | TRGV10 | TRGJ1  |
| TRG       | chr7       | TRGV9  | TRGJP  |
| TRG       | chr7       | TRGVA  | TRGJP1 |
| TRG       | chr7       | TRGV8  |        |
| TRG       | chr7       | TRGV7  |        |
| TRG       | chr7       | TRGV6  |        |
| TRG       | chr7       | TRGV5  |        |
| TRG       | chr7       | TRGV4  |        |
| TRG       | chr7       | TRGV3  |        |
| TRG       | chr7       | TRGV2  |        |
| TRG       | chr7       | TRGV1  |        |

**Table S4.8 List of Genes Assessed for Mutation on Panel**

| Chromosome | Region Name | Coding Sequence / Hotspot |
|------------|-------------|---------------------------|
| chr1       | ID3         | Entire Coding Sequence    |
| chr1       | ARID1A      | Entire Coding Sequence    |
| chr1       | JAK1        | Exons 12-15               |
| chr1       | NRAS        | Exons 2-4                 |
| chr1       | NOTCH2      | Exon 34                   |
| chr2       | DNMT3A      | Exons 8-23                |
| chr2       | XPO1        | Exons 15-16               |
| chr2       | CXCR4       | Entire Coding Sequence    |
| chr2       | SF3B1       | Exons 12-17               |
| chr2       | IDH1        | Exon 4                    |
| chr3       | MYD88       | Exon 5                    |
| chr3       | RHOA        | Entire Coding Sequence    |
| chr3       | PIK3CA      | Exons 2, 5 10 & 21        |
| chr4       | KIT         | Exons 9, 11, 13, 17 & 18  |
| chr4       | TET2        | Entire Coding Sequence    |
| chr4       | FBXW7       | Entire Coding Sequence    |
| chr4       | FAT1        | Entire Coding Sequence    |
| chr5       | IL7R        | Exon 6                    |
| chr6       | HIST1H1C    | Entire Coding Sequence    |
| chr6       | HIST1H1E    | Entire Coding Sequence    |
| chr6       | HIST1H1D    | Entire Coding Sequence    |
| chr6       | HIST1H1B    | Entire Coding Sequence    |
| chr6       | CCND3       | Exon 5                    |
| chr6       | NFKBIE      | Exon 1                    |
| chr6       | TNFAIP3     | Entire Coding Sequence    |
| chr7       | CARD11      | Exons 2-16                |
| chr7       | IKZF1       | Entire Coding Sequence    |
| chr7       | POT1        | Entire Coding Sequence    |

|       |         |                               |
|-------|---------|-------------------------------|
| chr7  | BRAF    | Exons 11 & 15                 |
| chr7  | EZH2    | Entire Coding Sequence        |
| chr8  | MYC     | Entire Coding Sequence        |
| chr9  | JAK2    | Exons 12 & 14                 |
| chr9  | CDKN2A  | Entire Coding Sequence        |
| chr9  | CDKN2B  | Entire Coding Sequence        |
| chr9  | PAX5    | Entire Coding Sequence        |
| chr9  | ABL1    | Exons 4-9                     |
| chr9  | NOTCH1  | Exons 26, 27 & 34             |
| chr9  | TRAF2   | Entire Coding Sequence        |
| chr10 | EGR2    | Mutation hotspot in Exon 2    |
| chr10 | PTEN    | Entire Coding Sequence        |
| chr10 | NT5C2   | Exons 9-15                    |
| chr11 | WT1     | Entire Coding Sequence        |
| chr11 | BIRC3   | Exons 8 & 9                   |
| chr11 | ATM     | Entire Coding Sequence        |
| chr11 | CBL     | Exons 7-9                     |
| chr12 | KRAS    | Exons 2, 3 & 4                |
| chr12 | MLL2    | Entire Coding Sequence        |
| chr12 | BTG1    | Entire Coding Sequence        |
| chr14 | TRAF3   | Entire Coding Sequence        |
| chr15 | MAP2K1  | Exons 1-8                     |
| chr15 | IDH2    | Exons 4 & 7                   |
| chr16 | CREBBP  | Entire Coding Sequence        |
| chr16 | SOCS1   | Entire Coding Sequence        |
| chr16 | PLCG2   | Exons 19, 20 & 24             |
| chr17 | TP53    | Entire Coding Sequence        |
| chr17 | STAT5B  | Exons 13-19                   |
| chr17 | STAT3   | Exons 10-16 & 20-21           |
| chr17 | MAP3K14 | Entire Coding Sequence        |
| chr17 | CD79B   | Exons 4, 5 & 6                |
| chr18 | BCL2    | Entire Coding Sequence        |
| chr19 | TCF3    | Entire Coding Sequence        |
| chr19 | KLF2    | Entire Coding Sequence        |
| chr19 | JAK3    | Exons 12-14                   |
| chr19 | CD79A   | Exons 4 & 5                   |
| chr20 | ASXL1   | Mutation hotspot in last exon |
| chr20 | SAMHD1  | Entire Coding Sequence        |
| chr21 | RUNX1   | Entire Coding Sequence        |
| chr21 | ERG     | Entire Coding Sequence        |
| chr22 | MAPK1   | Entire Coding Sequence        |
| chr22 | EP300   | Entire Coding Sequence        |
| chrX  | BTK     | Entire Coding Sequence        |
| chrX  | PHF6    | Entire Coding Sequence        |

**Table S4.9 List of Genes or Chromosome Regions Assessed for Copy Number Variation on Panel**

| Chromosome | Region Name | Parameter   |
|------------|-------------|-------------|
| chr3       | PIK3CA      | Copy Number |
| chr7       | IKZF1       | Copy Number |
| chr8       | MYC         | Copy Number |
| chr8       | 8qTEL       | Copy Number |
| chr9       | 9pTEL       | Copy Number |
| chr9       | CDKN2A      | Copy Number |
| chr9       | CDKN2B      | Copy Number |
| chr9       | PAX5        | Copy Number |
| chr9       | 9pCEN       | Copy Number |
| chr11      | 11qCEN      | Copy Number |
| chr11      | CCND1       | Copy Number |
| chr11      | ATM         | Copy Number |
| chr11      | 11qTEL      | Copy Number |
| chr12      | 12pTEL      | Copy Number |
| chr12      | ET6         | Copy Number |
| chr12      | 12pCEN      | Copy Number |
| chr12      | 12qCEN      | Copy Number |
| chr12      | BTG1        | Copy Number |
| chr12      | 12qTEL      | Copy Number |
| chr13      | 13qCEN      | Copy Number |
| chr13      | RB1         | Copy Number |
| chr13      | 13qTEL      | Copy Number |
| chr17      | 17pTEL      | Copy Number |
| chr7       | 7pTEL       | Copy Number |
| chr17      | TP53        | Copy Number |
| chr17      | 17pCEN      | Copy Number |

**Table S4.10 List of Additional Regions Assessed for Translocations on Panel**

| Chromosome | Region Name | Parameter     | Additional Description |
|------------|-------------|---------------|------------------------|
| chr1       | STIL        | Translocation | N/A                    |
| chr2       | ALK         | Translocation | N/A                    |
| chr3       | BCL6        | Translocation | N/A                    |
| chr11      | BCL1        | Translocation | N/A                    |
| chr11      | BIRC3       | Translocation | N/A                    |
| chr11      | KMT2A       | Translocation | N/A                    |
| chr14      | IGHA2       | Translocation | switch region          |
| chr14      | IGHE        | Translocation | switch region          |
| chr14      | IGHG4       | Translocation | switch region          |
| chr14      | IGHG2       | Translocation | switch region          |
| chr14      | IGHA1       | Translocation | switch region          |
| chr14      | IGHG1       | Translocation | switch region          |
| chr14      | IGHG3       | Translocation | switch region          |
| chr18      | BCL2        | Translocation | N/A                    |
| chrX       | CRLF2       | Translocation | N/A                    |

**Table S5. Regions covered on smMIP-based NGS panel performed at Radboud University Medical Center**

| Gene    | RefSeq            | Region of interest                               |
|---------|-------------------|--------------------------------------------------|
| AKT1    | NM_005163.2       | codon 17                                         |
| BIRC3   | NM_182962.2       | exon 7 to 10                                     |
| BRAF    | NM_004333.4       | codon 582-615                                    |
| BTK     | NM_000061.2       | codon 481                                        |
| CDKN2A  | (P14) NM_058195.1 | >95% of coding sequence and splice sites (-5/+5) |
| CDKN2A  | (P16) NM_000077.3 | >95% of coding sequence and splice sites (-5/+5) |
| CTNNB1  | NM_001904.3       | codon 19-48                                      |
| CXCR4   | NM_001008540.1    | codon 281-357                                    |
| CYSLTR2 | NM_001308471.2    | codon 129                                        |
| EGFR    | NM_005228.3       | codon 434-499, 688-823, 849-875                  |
| EIF1AX  | NM_001412.4       | codon 1-16                                       |
| ERBB2   | NM_004448.3       | codon 770-785                                    |
| EZH2    | NM_004456.4       | codon 471-502, 618-645, 679-704                  |
| GNA11   | NM_002067.4       | codon 183 and 209                                |
| GNAQ    | NM_002072.3       | codon 183 and 209                                |
| GNAS    | NM_000516.4       | codon 201 and 227                                |
| H3F3A   | NM_002107.4       | codon 28 and 35                                  |
| H3F3B   | NM_005324.4       | codon 37                                         |
| HRAS    | NM_005343.2       | codon 12, 13, 59 and 61                          |
| IDH1    | NM_005896.3       | codon 132                                        |
| IDH2    | NM_002168.3       | codon 140 and 172                                |
| JAK2    | NM_004972.3       | codon 617                                        |
| KIT     | NM_000222.2       | codon 412-513, 550-591, 628-713, 799-828         |
| KRAS    | NM_004985.4       | codon 12, 13, 59, 61, 117 and 146                |
| MPL     | NM_005373.2       | codon 515                                        |
| MYD88   | NM_002468.4       | codon 169-280                                    |
| NRAS    | NM_002524.4       | codon 12, 13, 59, 61, 117 and 146                |
| PDGFRA  | NM_006206.4       | codon 552-596, 632-667, 814-848                  |
| PIK3CA  | NM_006218.2       | codon 520-554, 1020-1069                         |
| PIM1    | NM_002648.3       | exon 1 to 6                                      |
| PLCB4   | NM_000933.3       | codon 630                                        |
| PLCG2   | NM_002661.4       | codon 665, 707-708, 845-846, 993, 1140-1144      |
| SF3B1   | NM_012433.2       | codon 603-671, 694-727, 833-906                  |
| TP53    | NM_000546.5       | >95% of coding sequence and splice sites (-5/+5) |

**Table S6.1 Underperforming regions of interest**

| Chromosome | Start     | Stop      | Target <sup>a</sup> | Classification   | GC Content <sup>b</sup> | HMW <sup>c</sup> (n=26) | FFPE <sup>c</sup> (n=21) |
|------------|-----------|-----------|---------------------|------------------|-------------------------|-------------------------|--------------------------|
| chr14      | 106088022 | 106088322 | IGHV1-8             | Rearrangement    | 0.52                    | 53.8                    | 71.4                     |
| chr11      | 132697125 | 132697225 | 11qTEL_rs1940150    | reference SNP ID | 0.30                    | 100.0                   | 81.0                     |
| chr12      | 43448951  | 43449051  | 12qCEN_rs2220865    | reference SNP ID | 0.34                    | 100.0                   | 90.5                     |
| chr12      | 131030078 | 131030178 | 12qTEL_rs1195889    | reference SNP ID | 0.56                    | 57.7                    | 100.0                    |
| chr12      | 131033171 | 131033271 | 12qTEL_rs7960677    | reference SNP ID | 0.60                    | 100.0                   | 90.5                     |
| chr13      | 23741443  | 23741543  | 13qCEN_rs36116586   | reference SNP ID | 0.38                    | 100.0                   | 71.4                     |
| chr17      | 20211440  | 20211540  | 17pCEN_rs2703812    | reference SNP ID | 0.57                    | 100.0                   | 90.5                     |
| chr17      | 19014895  | 19014995  | 17pCEN_rs28526726   | reference SNP ID | 0.65                    | 92.3                    | 76.2                     |
| chr17      | 714749    | 714849    | 17pTEL_rs2474694    | reference SNP ID | 0.72                    | 100.0                   | 95.2                     |
| chr7       | 1318876   | 1318976   | 7pTEL_rs10227104    | reference SNP ID | 0.65                    | 69.2                    | 66.7                     |
| chr7       | 1268215   | 1268315   | 7pTEL_rs12535561    | reference SNP ID | 0.64                    | 100.0                   | 100.0                    |
| chr7       | 1260115   | 1260215   | 7pTEL_rs36022572    | reference SNP ID | 0.71                    | 80.8                    | 81.0                     |
| chr7       | 1298433   | 1298533   | 7pTEL_rs4724908     | reference SNP ID | 0.61                    | 92.3                    | 57.1                     |
| chr8       | 140556338 | 140556438 | 8qTEL_rs2271736     | reference SNP ID | 0.66                    | 53.8                    | 52.4                     |
| chr8       | 140542050 | 140542150 | 8qTEL_rs2977475     | reference SNP ID | 0.63                    | 100.0                   | 66.7                     |
| chr8       | 140563209 | 140563309 | 8qTEL_rs2977490     | reference SNP ID | 0.54                    | 96.2                    | 95.2                     |
| chr12      | 11893674  | 11893774  | ET6CN_rs2855750     | reference SNP ID | 0.26                    | 100.0                   | 100.0                    |
| chr9       | 36943480  | 36943580  | PAX5CN_rs10123881   | reference SNP ID | 0.41                    | 100.0                   | 100.0                    |
| chr9       | 37025371  | 37025471  | PAX5CN_rs3758178    | reference SNP ID | 0.65                    | 100.0                   | 100.0                    |
| chr13      | 48317650  | 48317750  | RB1CN_rs3825417     | reference SNP ID | 0.72                    | 96.2                    | 61.9                     |
| chr13      | 48457646  | 48457746  | RB1CN_rs9568042     | reference SNP ID | 0.72                    | 100.0                   | 95.2                     |
| chr13      | 48461409  | 48461509  | RB1CN_rs9568043     | reference SNP ID | 0.33                    | 100.0                   | 100.0                    |
| chr19      | 17830098  | 17830228  | JAK3_23             | Somatic Mutation | 0.69                    | 100.0                   | 95.2                     |
| chr22      | 21867311  | 21867520  | MAPK1_1             | Somatic Mutation | 0.76                    | 100.0                   | 76.2                     |
| chr19      | 1622044   | 1622233   | TCF3_10             | Somatic Mutation | 0.72                    | 80.8                    | 81.0                     |
| chr19      | 1621103   | 1621203   | TCF3_12             | Somatic Mutation | 0.71                    | 84.6                    | 76.2                     |
| chr19      | 1650158   | 1650258   | TCF3_2              | Somatic Mutation | 0.64                    | 100.0                   | 90.5                     |
| chr19      | 1622303   | 1622425   | TCF3_9              | Somatic Mutation | 0.67                    | 100.0                   | 95.2                     |
| chr9       | 136886480 | 136886581 | TRAF2_1             | Somatic Mutation | 0.80                    | 100.0                   | 100.0                    |
| chr9       | 136886711 | 136886814 | TRAF2_2             | Somatic Mutation | 0.70                    | 100.0                   | 76.2                     |
| chrX       | 1212556   | 1218022   | CRLF2_MBR           | Translocation    | 0.53                    | 50.0                    | 71.4                     |

<sup>a</sup> Regions were classed as underperforming if coverage was >2 standard deviations (SD) below the mean in  $\geq 50\%$  samples.

<sup>b</sup> GC content, expressed as a range between 0-1, of the region captured by the specified probe

<sup>c</sup> Percentage of samples with a log transformed coverage value >2 standard deviations (SD) of the mean .



**Table S6.2 Sequencing performance**

|                            | <b>Proficiency<sup>a</sup></b> | <b>Validation (All)<sup>b</sup></b> | <b>Validation (HMW)<sup>c</sup></b> | <b>Validation (FFPE)<sup>d</sup></b> |
|----------------------------|--------------------------------|-------------------------------------|-------------------------------------|--------------------------------------|
|                            | <b>(n = 98)</b>                | <b>(n = 308)</b>                    | <b>(n = 220)</b>                    | <b>(n = 88)</b>                      |
| Total Reads - Average      | 17,594,145                     | 12,711,040                          | 13,282,842                          | 11,281,534                           |
| Total Reads - SD           | 6,914,318                      | 3,619,403                           | 3,305,593                           | 3,978,340                            |
| Unique PF Reads - Average  | 10,977,284                     | 7,261,695                           | 7,700,370                           | 6,165,008                            |
| Unique PF Reads - SD       | 4,337,890                      | 2,585,797                           | 2,625,606                           | 2,130,213                            |
| % PCR Duplicates - Average | 37.3                           | 45.7                                | 45.2                                | 47.0                                 |
| % PCR Duplicates - SD      | 13.4                           | 10.4                                | 10.5                                | 10.0                                 |
| Coverage Depth - Average   | 1628.2                         | 1037.9                              | 1067.0                              | 965.3                                |
| Coverage Depth - SD        | 627.1                          | 422.7                               | 417.4                               | 429.7                                |

<sup>a</sup> Each of the seven sites performed a proficiency run comprising 14 cell lines (7 x 14 = 98)

<sup>b</sup> Each of the seven sites performed 2 validation runs comprising 22 samples (14 x 22 = 308)

<sup>c</sup> High molecular weight (HMW) samples which comprised 220 of the 308 samples in the validation run were analysed separately

<sup>d</sup> Formalin fixed paraffin embedded (FFPE) samples which comprised 88 of the 308 samples in the validation run were analysed separately

**Table S7. Limit of Detection**

| NGS Site         | Cell Line <sup>a</sup> | Cell Lineage | Rearrangements <sup>b</sup> |      |      |       | Translocations <sup>c</sup> |     |      |       |
|------------------|------------------------|--------------|-----------------------------|------|------|-------|-----------------------------|-----|------|-------|
|                  |                        |              | 10%                         | 5%   | 2.5% | 1.25% | 10%                         | 5%  | 2.5% | 1.25% |
| Site 1           | RS4:11                 | B-cell       | 4/4                         | 4/4  | 4/4  | 1/4   | 1/1                         | 1/1 | 1/1  | 1/1   |
| Site 2           | KCA                    | B-cell       | 4/4                         | 4/4  | 2/4  | 2/4   | N/A                         | N/A | N/A  | N/A   |
| Site 3           | Loucy                  | T-cell       | 6/6                         | 6/6  | 6/6  | 0/6   | N/A                         | N/A | N/A  | N/A   |
| Site 4           | KT1                    | T-cell       | 4/4                         | 4/4  | 3/4  | 2/4   | N/A                         | N/A | N/A  | N/A   |
| Site 5           | H929                   | B-cell       | 4/4                         | 2/4  | 0/4  | 1/4   | 1/1                         | 1/1 | 0/1  | 0/1   |
| Site 6           | Ichikawa               | T-cell       | 5/5                         | 5/5  | 5/5  | 0/5   | 1/1                         | 1/1 | 0/1  | 0/1   |
| Site 7           | REH                    | T-cell       | 7/7                         | 7/7  | 6/7  | 5/7   | 1/1                         | 0/1 | 0/1  | 0/1   |
| Expected Events  |                        |              | 34                          | 34   | 34   | 34    | 4                           | 4   | 4    | 4     |
| Observed Events  |                        |              | 34                          | 32   | 26   | 11    | 4                           | 3   | 1    | 1     |
| Percentage Found |                        |              | 100.0                       | 94.1 | 76.5 | 32.4  | 100                         | 75  | 25   | 25    |

<sup>a</sup> Cell line detailed was diluted with gDNA from a different cell line at mass ratios of 10%, 5.0%, 2.5% and 1.25%.

<sup>b</sup> The number of observed (numerator) and expected (denominator) rearrangements for each dilution of the cell line is shown.

<sup>c</sup> The number of observed (numerator) and expected (denominator) translocations for each dilution of the cell line is shown.

**Table S8. Summary of cases with clonal IGH rearrangement by EuroClonality-NDC assay but not by BIOMED-2 PCR**

| Disease Entity <sup>a</sup> | BIOMED-2 PCR Result |     |     |     |     |                  |     |                  | EuroClonality-NDC Result |                  |                  |               |
|-----------------------------|---------------------|-----|-----|-----|-----|------------------|-----|------------------|--------------------------|------------------|------------------|---------------|
|                             | IGH <sup>b</sup>    |     |     |     |     | IGK <sup>b</sup> |     | IGL <sup>b</sup> | IGH <sup>b</sup>         | IGK <sup>b</sup> | IGL <sup>b</sup> | Translocation |
|                             |                     | A   | B   | C   | D   | A                | B   |                  |                          |                  |                  |               |
|                             | LD                  | FR1 | FR2 | FR3 | D-J | V-J              | Kde | V-J              |                          |                  |                  |               |
| AITL                        | -                   | NC  | NC  | NC  | -   | C                | NC  | -                | C                        | C                | N                | None          |
| ALCL                        | -                   | P   | P   | P   | -   | P                | P   | -                | C                        | N                | N                | ALK-NPM1      |
| ALCL                        | -                   | P   | P   | P   | -   | P                | P   | -                | C                        | C                | N                | ALK-NPM1      |
| B-ALL                       | -                   | P   | P   | P   | NC  | NC               | C   | -                | C                        | C                | C                | IGH-BLID      |
| DLBCL                       | -                   | P   | P   | P   | -   | C                | P   | -                | C                        | C                | N                | None          |
| DLBCL                       | -                   | P   | P   | P   | -   | P                | P   | -                | C                        | C                | N                | IGH-BCL6      |
| FL                          | -                   | P   | P   | P   | -   | C                | P   | -                | C                        | C                | N                | None          |
| FL                          | -                   | P   | P   | P   | -   | C                | P   | -                | C                        | C                | C                | IGH-BCL2      |
| FL                          | -                   | P   | P   | P   | -   | C                | P   | -                | C                        | C                | C                | IGH-BCL2      |
| MCL                         | -                   | P   | P   | P   | -   | C                | P   | -                | C                        | C                | N                | IGH-CCND1     |
| PCM                         | -                   | -   | P   | P   | -   | -                | -   | -                | C                        | C                | N                | IGH-CCND1     |

<sup>a</sup>Disease entity: AITL, angioimmunoblastic T-cell lymphoma; ALCL, anaplastic large-cell lymphoma; B-ALL, B-cell Acute Lymphoblastic Leukemia; DLBCL, diffuse large B-cell lymphoma; FL, follicular lymphoma; MCL, mantle cell lymphoma; PCM, plasma cell myeloma.

<sup>b</sup>Rearrangement patterns of IG loci: C, clonal; NC, not clonal; P, Polyclonal; “-”, clonality data not provided by original laboratory.

**Table S9. Summary of cases with clonal IGK rearrangement by EuroClonality-NDC assay but not by BIOMED-2 PCR**

| Disease Entity <sup>a</sup> | BIOMED-2 PCR Result |     |     |     |     |                  |     |                  | EuroClonality-NDC Result |                  |        |                  |               |
|-----------------------------|---------------------|-----|-----|-----|-----|------------------|-----|------------------|--------------------------|------------------|--------|------------------|---------------|
|                             | IGH <sup>b</sup>    |     |     |     |     | IGK <sup>b</sup> |     | IGL <sup>b</sup> | IGH <sup>b</sup>         | IGK <sup>b</sup> |        | IGL <sup>b</sup> | Translocation |
|                             | LD                  | A   | B   | C   | D   | A                | B   | V-J              |                          | Vκ-Jκ            | Vκ-Kde |                  |               |
|                             |                     | FR1 | FR2 | FR3 | D-J | V-J              | Kde |                  |                          | V-J              |        |                  |               |
| ALCL                        | -                   | P   | P   | P   | -   | P                | P   | -                | C                        | NC               | C      | NC               | ALK-NPM1      |
| B-ALL                       | -                   | C   | C   | C   | P   | P                | P   | -                | C                        | C                | NC     | NC               | IGH-MYC       |
| BL                          | -                   | C   | C   | C   | -   | P                | P   | -                | C                        | C                | N      | NC               | IGH-MYC       |
| BL                          | -                   | NC  | NC  | C   | C   | NC               | NC  | -                | C                        | C                | NC     | NC               | IGH-MYC       |
| BL                          | -                   | P   | C   | C   | -   | P                | P   | -                | C                        | NC               | C      | C                | IGH-MYC       |
| DLBCL                       | -                   | P   | C   | P   | N   | P                | P   | -                | C                        | C                | NC     | NC               | IGH-BCL2      |
| DLBCL                       | -                   | P   | P   | P   | -   | P                | P   | -                | C                        | C                | NC     | NC               | IGH-BCL6      |
| FL                          | -                   | C   | P   | P   | -   | P                | P   | -                | C                        | C                | C      | C                | IGH-BCL2      |
| FL                          | -                   | P   | P   | P   | -   | P                | P   | -                | NC                       | C                | NC     | NC               | IGH-BCL2      |
| FL                          | -                   | P   | P   | P   | -   | P                | P   | -                | NC                       | NC               | C      | NC               | None          |
| FL                          | -                   | P   | C   | C   | -   | P                | P   | -                | C                        | C                | C      | NC               | IGH-BCL2      |
| FL                          | -                   | P   | P   | P   | -   | P                | P   | -                | NC                       | C                | C      | NC               | IGH-BCL2      |
| MALT                        | -                   | C   | C   | P   | P   | P                | NC  | -                | C                        | C                | NC     | NC               | None          |
| MALT                        | -                   | C   | C   | C   | P   | P                | P   | -                | C                        | C                | NC     | NC               | None          |
| MCL                         | -                   | C   | C   | C   | P   | P                | P   | -                | C                        | C                | NC     | NC               | IGH-CCND1     |
| MCL                         | -                   | P   | C   | C   | -   | P                | P   | -                | C                        | C                | NC     | NC               | IGH-CCND1     |
| MCL                         | -                   | C   | C   | C   | -   | P                | P   | -                | C                        | C                | C      | C                | IGH-CCND1     |
| PCM                         | -                   | C   | C   | P   | C   | P                | P   | -                | C                        | C                | NC     | NC               | None          |
| PCM                         | -                   | P   | C   | P   | C   | P                | P   | -                | C                        | C                | NC     | NC               | None          |
| PCM                         | -                   | C   | C   | -   | P   | -                | P   | -                | C                        | C                | NC     | C                | None          |
| PCM                         | -                   | -   | C   | P   | P   | P                | P   | -                | C                        | C                | NC     | NC               | IGH-CCND1     |
| MZL                         | -                   | C   | C   | C   | -   | P                | P   | -                | C                        | C                | C      | NC               | None          |
| MZL                         | -                   | P   | P   | P   | C   | P                | P   | -                | C                        | NC               | C      | NC               | MALT1-BIRC3   |
| MZL                         | -                   | C   | C   | C   | C   | P                | P   | -                | C                        | C                | NC     | NC               | None          |
| MZL                         | C                   | -   | -   | -   | NC  | NC               | NC  | C                | C                        | C                | NC     | NC               | None          |

<sup>a</sup>Disease entity: ALCL, anaplastic large-cell lymphoma; B-ALL, B-cell Acute Lymphoblastic Leukemia; BL, Burkitt lymphoma; DLBCL, diffuse large B-cell lymphoma; FL, follicular lymphoma; MALT, Mucosa-Associated Lymphoid Tissue; MCL, mantle cell lymphoma; PCM, plasma cell myeloma, MZL, Marginal zone lymphoma.

<sup>b</sup>Rearrangement patterns of IG loci: C, clonal; NC, not clonal; P, Polyclonal; "-", clonality data not provided by original laboratory.

**Table S10. IGL cases per disease entity**

| Disease Entity <sup>a</sup> | Total No. | Lambda RR | % samples with lambda RR's |
|-----------------------------|-----------|-----------|----------------------------|
| BL                          | 17        | 7         | 41.2                       |
| CLL                         | 37        | 17        | 45.9                       |
| DLBCL                       | 21        | 7         | 33.3                       |
| FL                          | 34        | 12        | 35.3                       |
| MALT                        | 3         | 0         | 0.0                        |
| MCL                         | 34        | 17        | 50.0                       |
| PCM                         | 24        | 8         | 33.3                       |
| MZL & SMZL                  | 7         | 2         | 28.6                       |
| B-ALL                       | 20        | 6         | 30                         |
| Total                       | 197       | 76        | 38.6                       |

<sup>a</sup>Disease entity: BL, burkitt lymphoma; CLL, chronic lymphocytic leukemia; DLBCL, diffuse large B-cell lymphoma; FL, follicular lymphoma; MALT, Mucosa-Associated Lymphoid Tissue; MCL, mantle cell lymphoma; PCM, plasma cell myeloma, MZL, Marginal zone lymphoma; B-ALL, B-cell Acute Lymphoblastic Leukemia.



**Table S12. Cases exhibiting a discrepancy between originating lab PCR data and EuroClonality-NDC assay results for TCR rearrangement**

| TCR Loci <sup>a</sup> | Disease Entity | BIOMED-2 PCR Result |                  |                  |                  |                  |                  |                  | EuroClonality-NDC Result |                  |                  |                  |               |
|-----------------------|----------------|---------------------|------------------|------------------|------------------|------------------|------------------|------------------|--------------------------|------------------|------------------|------------------|---------------|
|                       |                | TRB <sup>c</sup>    | TRB <sup>c</sup> | TRB <sup>c</sup> | TRG <sup>c</sup> | TRG <sup>c</sup> | TRD <sup>c</sup> | TRA <sup>c</sup> | TRB <sup>c</sup>         | TRG <sup>c</sup> | TRD <sup>c</sup> | TRA <sup>c</sup> | Translocation |
|                       |                | A                   | B                | C                | A                | B                |                  |                  |                          |                  |                  |                  |               |
| V-J                   | V-J            | D-J                 | V-J              | V-J              | V-J, D-J         | V-J              |                  |                  |                          |                  |                  |                  |               |
| TRB                   | AITL           | P                   | P                | P                | C                | C                | -                | -                | C                        | C                | NC               | C                | None          |
| TRB                   | ALCL           | P                   | P                | P                | P                | P                | -                | -                | C                        | C                | C                | NC               | None          |
| TRG                   | AITL           | P                   | P                | P                | P                | P                | -                | -                | NC                       | C                | NC               | C                | None          |
| TRG                   | ALCL           | C                   | P                | P                | P                | P                | -                | -                | C                        | C                | C                | C                | ALK           |
| TRG                   | ALCL           | P                   | P                | P                | P                | P                | -                | -                | C                        | C                | C                | NC               | ALK           |
| TRG                   | ALCL           | P                   | P                | C                | P                | P                | -                | -                | C                        | C                | C                | NC               | ALK           |
| TRG                   | ALCL           | P                   | P                | C                | P                | P                | -                | -                | C                        | C                | NC               | C                | ALK           |
| TRD                   | B-ALL          | -                   | -                | -                | C                | NC               | NC               | -                | NC                       | C                | C                | C                | None          |
| TRD                   | B-ALL          | -                   | -                | -                | NC               | C                | NC               | -                | C                        | C                | C                | NC               | None          |
| TRD                   | B-ALL          | -                   | -                | -                | NC               | NC               | NC               | -                | NC                       | NC               | C                | C                | None          |
| TRD                   | T-ALL          | C                   | NC               | C                | NC               | C                | NC               | -                | C                        | C                | C                | C                | TAL1-STIL     |
| TRA                   | B-ALL          | C                   | NC               | NC               | NC               | C                | NC               | NC               | C                        | C                | NC               | C                | IGH-CRLF2     |
| TRA                   | B-ALL          | NC                  | NC               | NC               | NC               | C                | NC               | NC               | NC                       | C                | NC               | C                | IGH-CRLF2     |
| TRA                   | B-ALL          | -                   | -                | -                | C                | NC               | NC               | NC               | NC                       | C                | NC               | C                | IGH-CRLF2     |
| TRA                   | B-ALL          | -                   | -                | -                | C                | C                | NC               | NC               | C                        | C                | NC               | C                | IGH-CRLF2     |
| TRA                   | B-ALL          | -                   | -                | -                | NC               | C                | NC               | NC               | C                        | C                | NC               | C                | IGH-CRLF2     |
| TRA                   | T-ALL          | C                   | P                | C                | C                | C                | C                | P                | C                        | C                | C                | C                | None          |
| TRA                   | T-ALL          | C                   | P                | C                | C                | P                | C                | P                | C                        | C                | C                | C                | TRD-TLX1      |
| TRA                   | T-ALL          | R                   | P                | C                | C                | P                | C                | P                | C                        | C                | C                | C                | TRB-TLX1      |
| TRA                   | T-ALL          | P                   | C                | C                | C                | C                | C                | P                | C                        | C                | C                | C                | None          |

<sup>a</sup>Loci where discrepancy between EuroClonality-NDC assay and originating lab PCR data occurred.

<sup>b</sup>Disease entity: AITL, Angioimmunoblastic T-cell lymphoma; ALCL, Anaplastic large-cell lymphoma; B-ALL, B-cell Acute Lymphoblastic Leukemia; T-ALL, T Acute Lymphoblastic leukemia.

<sup>c</sup>Rearrangement patterns of TCR loci were described as C, clonal; NC, not clonal; P, Polyclonal; R, Restricted; “-”, clonality data not provided by original laboratory.

**Table S13. Comparison of the EuroClonality-NDC assay with Southern blot results in 50 samples from the original BIOMED-2 paper**

| Locus | Total Tested | Benchmark - Clonal |                  | Benchmark – Not Clonal |                  |
|-------|--------------|--------------------|------------------|------------------------|------------------|
|       |              | NGS - Clonal       | NGS – Not Clonal | NGS - Clonal           | NGS – Not Clonal |
| IGH   | 50           | 32                 | 1                | 3                      | 14               |
| IGK   | 50           | 28                 | 2                | 10                     | 10               |
| IGL   | 50           | 9                  | 1                | 4                      | 36               |
| TRA   | 0            | 0                  | 0                | 0                      | 0                |
| TRB   | 50           | 13                 | 2                | 7                      | 28               |
| TRD   | 50           | 8                  | 1                | 2                      | 39               |
| TRG   | 49           | 10                 | 0                | 12                     | 27               |



**Table S14. Combination of four parameters for clonality detection**

| Disease Entity <sup>a</sup> | IG/TCR Rearrangements |     |     |     |     |     |     | Translocation | Copy Number   | Mutation     |         |         |             |                |              |
|-----------------------------|-----------------------|-----|-----|-----|-----|-----|-----|---------------|---------------|--------------|---------|---------|-------------|----------------|--------------|
|                             | IGH                   | IGK | IGL | TRB | TRG | TRD | TRA |               |               | Chr Location | Gene    | VAF (%) | Annotation  | HGVS.c         | HGVS.p       |
| B-ALL                       | N                     | N   | N   | C   | C   | C   | C   | IGH-SLC25A12  | IGH, TRB, TRG | N            | N       | N       | N           | N              | N            |
| BL                          | N                     | N   | N   | N   | N   | N   | N   | N             | IGH           | N            | N       | N       | N           | N              | N            |
| BL                          | N                     | N   | N   | N   | N   | N   | N   | N             | N             | N            | N       | N       | N           | N              | N            |
| MCL                         | N                     | N   | N   | N   | N   | N   | N   | N             | N             | N            | N       | N       | N           | N              | N            |
| FL                          | N                     | N   | N   | N   | N   | N   | N   | IGH-BCL2      | IGH, IGK      | 6:137879333  | TNFAIP3 | 19.1    | stop gained | c.1888G>T      | p.Glu630*    |
|                             |                       |     |     |     |     |     |     |               |               | 12:49024679  | KMT2D   | 18.0    | stop gained | c.15951T>A     | p.Tyr5317*   |
|                             |                       |     |     |     |     |     |     |               |               | 16:3749667   | CREBBP  | 17.0    | stop gained | c.3796C>T      | p.Gln1266*   |
| FL                          | N                     | N   | N   | N   | N   | N   | N   | IGH-BCL2      | N             | N            | N       | N       | N           | N              | N            |
| T-ALL                       | N                     | N   | N   | N   | N   | N   | N   | N             | N             | X:134425206  | PHF6    | 33.5    | missense    | c.974A>G       | p.Tyr325Cys  |
|                             |                       |     |     |     |     |     |     |               |               | 11:108256229 | ATM     | 33.0    | missense    | c.2139A>C      | p.Glu713Asp  |
|                             |                       |     |     |     |     |     |     |               |               | 9:136504937  | NOTCH1  | 30.7    | missense    | c.4754T>C      | p.Leu1585Pro |
|                             |                       |     |     |     |     |     |     |               |               | 21:34880619  | RUNX1   | 30.3    | frameshift  | c.445_446insGG | p.Ala149fs   |
|                             |                       |     |     |     |     |     |     |               |               | 1:64846682   | JAK1    | 13.0    | missense    | c.1954T>A      | p.Tyr652Asn  |
| ALCL                        | N                     | N   | N   | N   | N   | N   | N   | ALK-RANBP2    | N             | N            | N       | N       | N           | N              | N            |

<sup>a</sup>Disease entity: B-ALL, B-cell Acute Lymphoblastic Leukemia; BL, burkitt lymphoma; MCL, mantle cell lymphoma; FL, follicular lymphoma; T-ALL, T Acute Lymphoblastic leukemia; ALCL Anaplastic large-cell lymphoma.

## Supplementary Figures

**Figure S1. Assessment of intra- and inter-run replicates using two B-ALL (GMS469 and GMS471) samples.** Both samples were included in the validation cohort (labelled ‘Original’) and were also ran in triplicate (labelled Replicate 1-3) during the intra-run precision assessment. The ‘percentage in locus’ and ‘percentage in class’ values were compared across all runs.

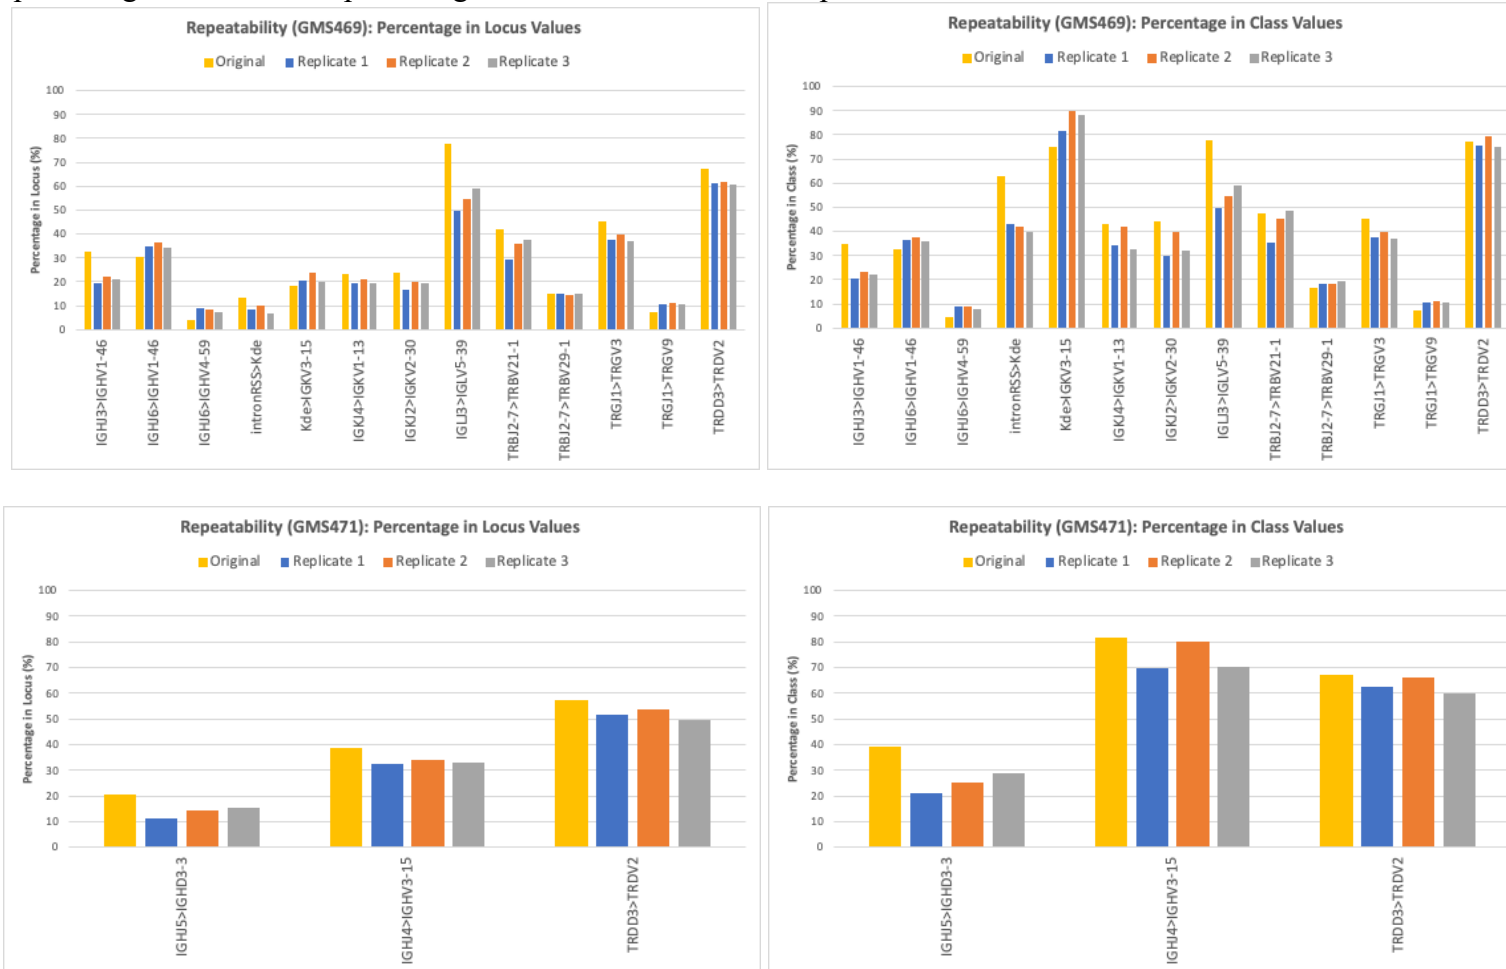

**Figure S2. Association between ddPCR result and the number of fragments identified assigned to a specific rearrangement by the EuroClonality-NDC assay.** The number of fragments identified by the EuroClonality-NDC assay containing the clonal rearrangement were displayed on a box and whisker plot and grouped by ddPCR classification (specific amplification defined as the clonal abundance of the rearrangement being >1% [sa]; minor amplification defined as the clonal abundance of the rearrangement being <1% [minor]; the specific signal was lower than the polyclonal control [ua]; no PCR product was evident [neg]).

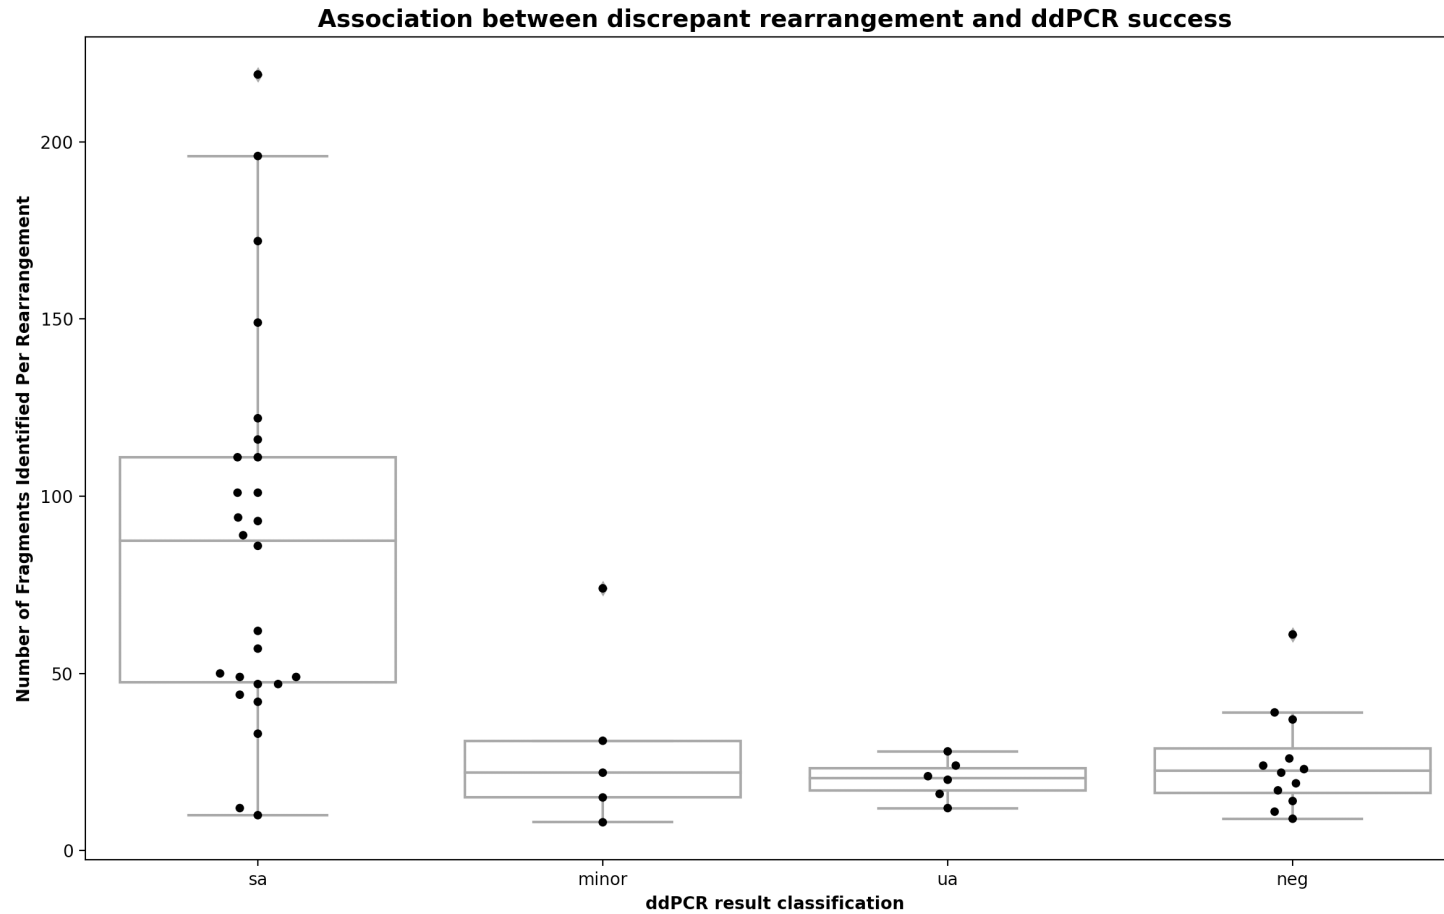

**Figure S3. Confirmation of IGH rearrangements detected by the EuroClonality-NDC assay, but not by the EuroClonality/BIOMED-2 PCR, using the EuroClonality-NDC CNA pipeline.** The upper panel displays the result of the rearrangement pipeline (ARResT/Interrogate). The lower panel is a graphical representation of the CNA coverage depth ratio calculated between an individual tumour sample and the mean value of normal samples for each region included in the bed file. CNA ratios <0.8 and >1.2 are coloured in blue and red respectively.

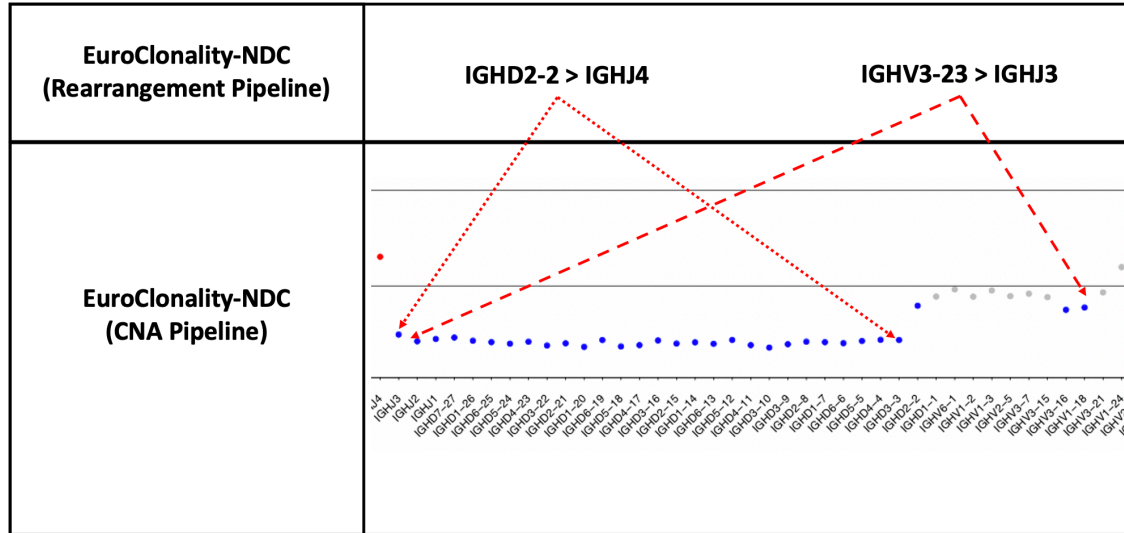

**Figure S4. Confirmation of an IGK rearrangement detected by the EuroClonality-NDC assay, but not by the EuroClonality/BIOMED-2 PCR, using the EuroClonality-NDC CNA pipeline.** The upper panel displays the result of the rearrangement pipeline (ARResT/Interrogate). The lower panel is a graphical representation of the CNA coverage depth ratio calculated between an individual tumour sample and the mean value of normal samples for each region included in the bed file. CNA ratios <0.8 and >1.2 are coloured in blue and red respectively.

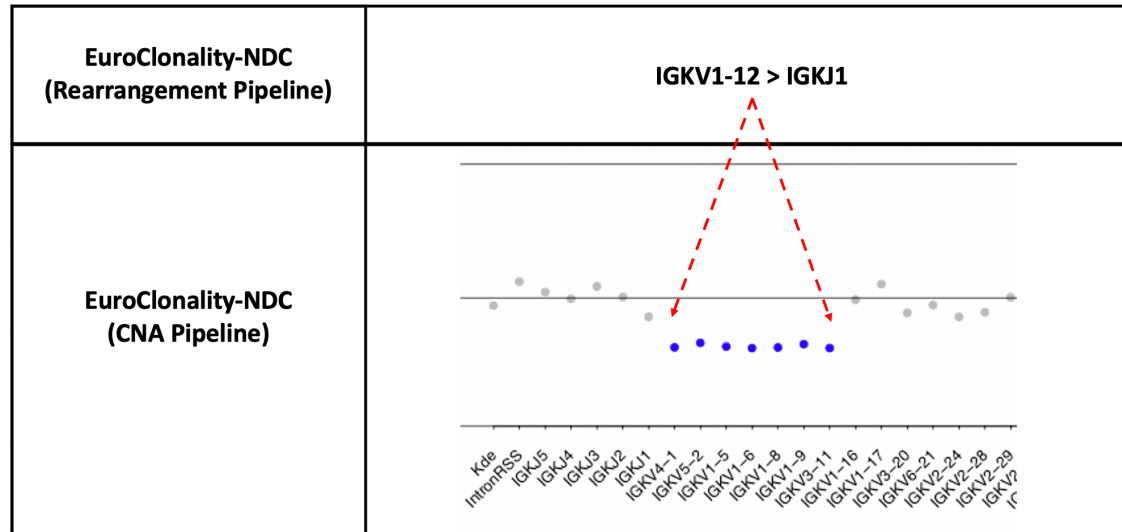

**Figure S5. Confirmation of an IGL rearrangement detected by the EuroClonality-NDC assay, but not by the EuroClonality/BIOMED-2 PCR, using the EuroClonality-NDC CNA pipeline.** The upper panel displays the result of the rearrangement pipeline (ARResT/Interrogate). The lower panel is a graphical representation of the CNA coverage depth ratio calculated between an individual tumour sample and the mean value of normal samples for each region included in the bed file. CNA ratios <0.8 and >1.2 are coloured in blue and red respectively.

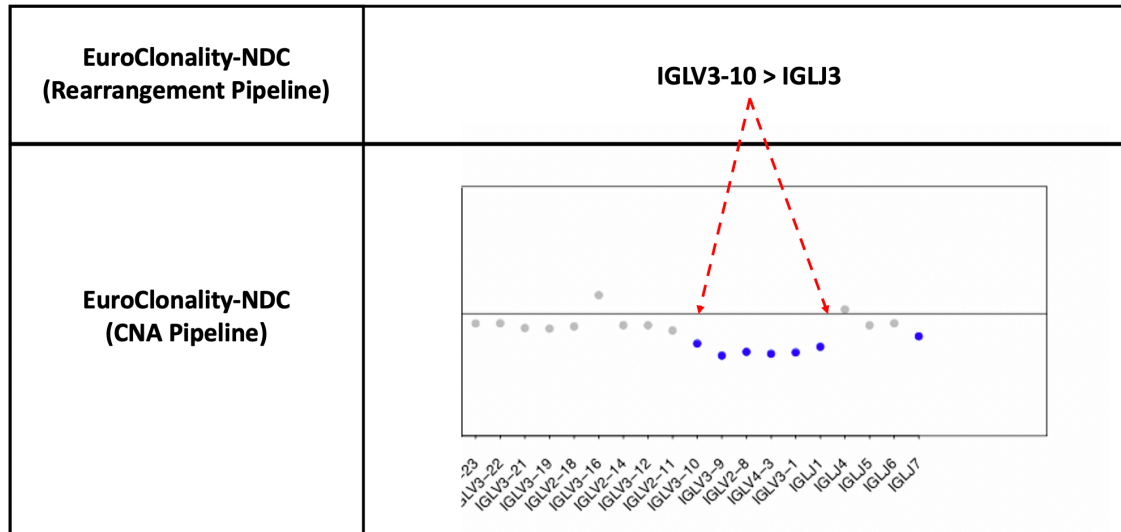

**Figure S6. Oncoplot showing the most frequently mutated genes identified in B-cell Acute Lymphoblastic Leukemia (B-ALL) patients present within the validation cohort.** Mutations were identified in 16 of the 20 B-ALL patients included within the final validation cohort of 270 samples. Each column represents one patient while each row represents the absence (grey) or presence (colour) of a mutation within the defined gene in each sample. Mutations are color-coded by mutation nomenclature using the key located at the bottom of the figure. Percentages indicate number of samples identified with a mutation of the defined gene. The top barplot has the number of mutations identified in each patient. The right-hand barplot provides the number of mutations in the defined gene which are coloured by mutation nomenclature.

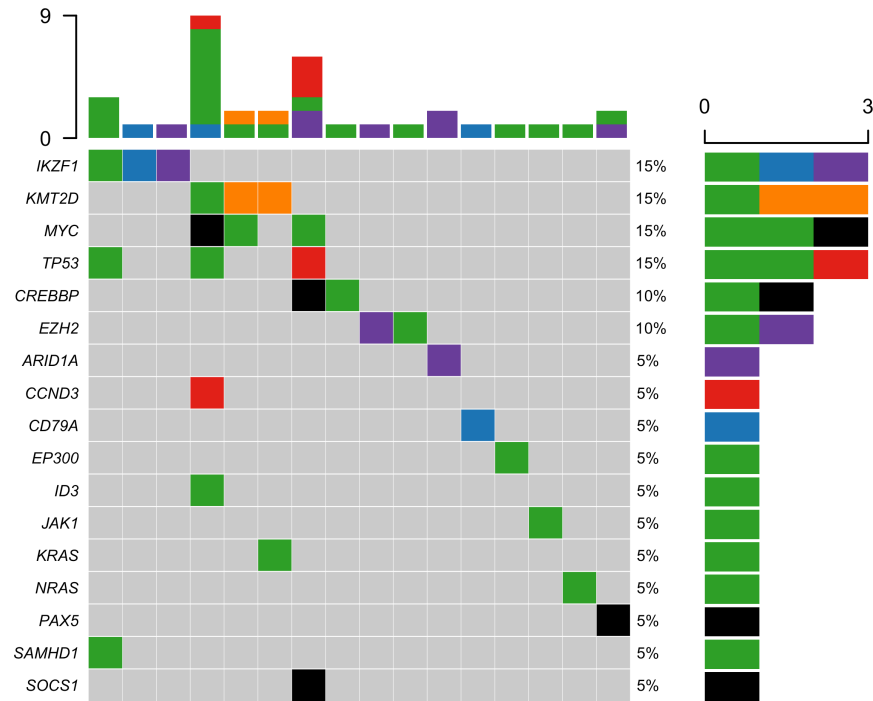

- Missense\_Mutation
- Splice\_Site
- Frame\_Shift\_Del
- Nonsense\_Mutation
- Frame\_Shift\_Ins
- Multi\_Hit

**Figure S7. Oncoplot showing the most frequently mutated genes identified in Burkitt lymphoma (BL) patients present within the validation cohort.** Mutations were identified in 13 of the 17 BL patients included within the final validation cohort of 270 samples. Each column represents one patient while each row represents the absence (grey) or presence (colour) of a mutation within the defined gene in each sample. Mutations are color-coded by mutation nomenclature using the key located at the bottom of the figure. Percentages indicate number of samples identified with a mutation of the defined gene. The top barplot has the number of mutations identified in each patient. The right-hand barplot provides the number of mutations in the defined gene which are coloured by mutation nomenclature.

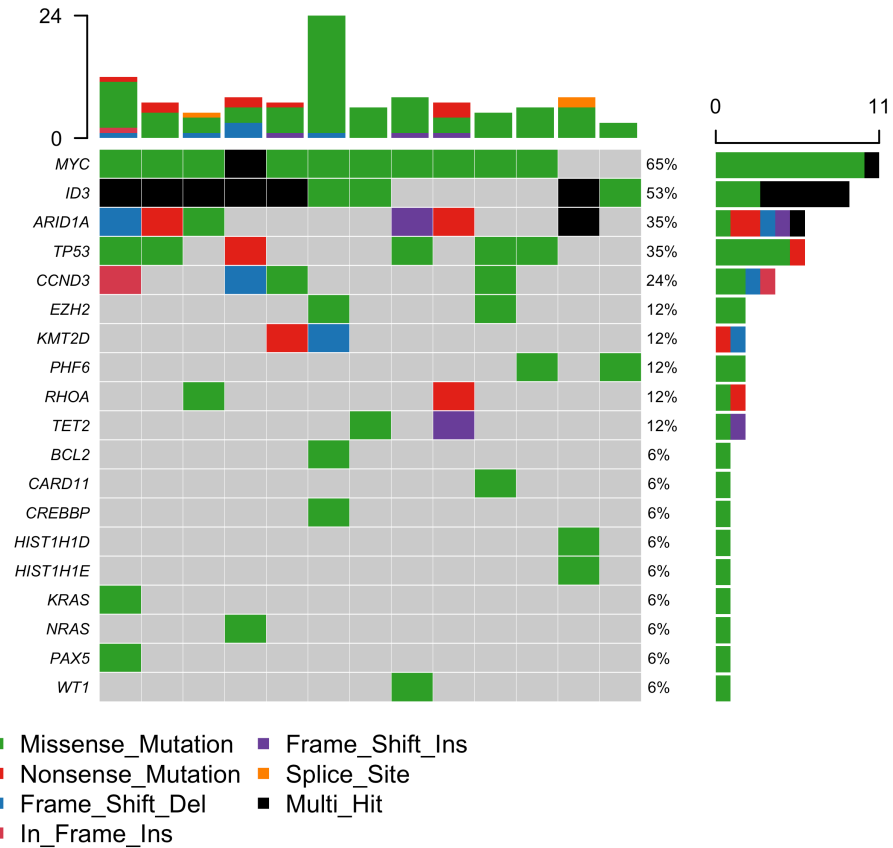



**Figure S8. Oncoplot showing the most frequently mutated genes identified in Chronic lymphocytic leukemia (CLL) patients present within the validation cohort.** Mutations were identified in 24 of the 37 CLL patients included within the final validation cohort of 270 samples. Each column represents one patient while each row represents the absence (grey) or presence (colour) of a mutation within the defined gene in each sample. Mutations are color-coded by mutation nomenclature using the key located at the bottom of the figure. Percentages indicate number of samples identified with a mutation of the defined gene. The top barplot has the number of mutations identified in each patient. The right-hand barplot provides the number of mutations in the defined gene which are coloured by mutation nomenclature.

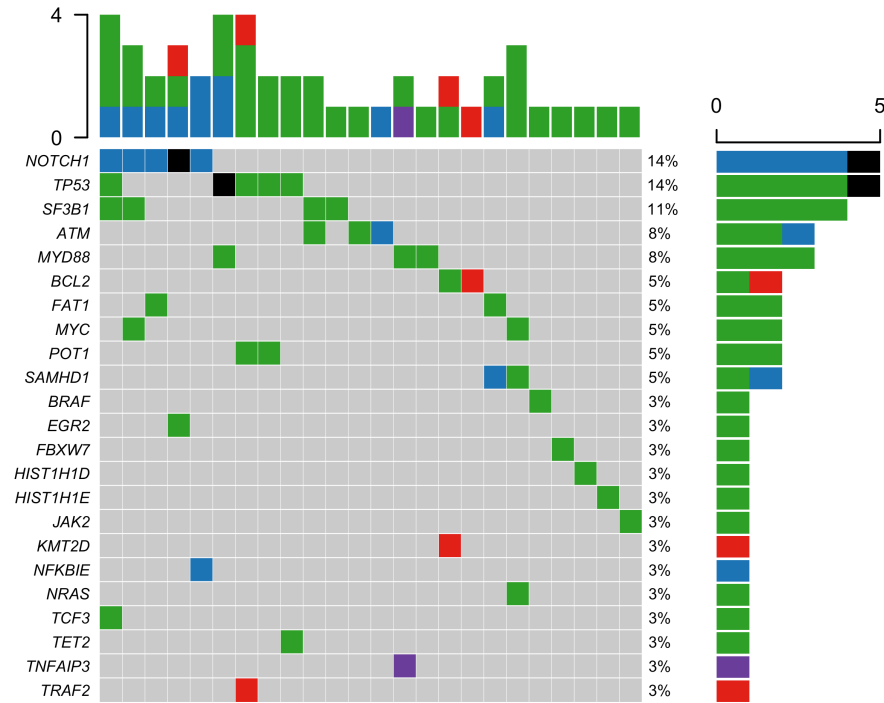

- Missense\_Mutation
- Frame\_Shift\_Del
- Nonsense\_Mutation
- Frame\_Shift\_Ins
- Multi\_Hit

**Figure S9. Oncoplot showing the most frequently mutated genes identified in Diffuse large B-cell lymphoma (DLBCL) patients present within the validation cohort.** Mutations were identified in 19 of the 20 CLL patients included within the final validation cohort of 270 samples. Each column represents one patient while each row represents the absence (grey) or presence (colour) of a mutation within the defined gene in each sample. Mutations are color-coded by mutation nomenclature using the key located at the bottom of the figure. Percentages indicate number of samples identified with a mutation of the defined gene. The top barplot has the number of mutations identified in each patient. The right-hand barplot provides the number of mutations in the defined gene which are coloured by mutation nomenclature.

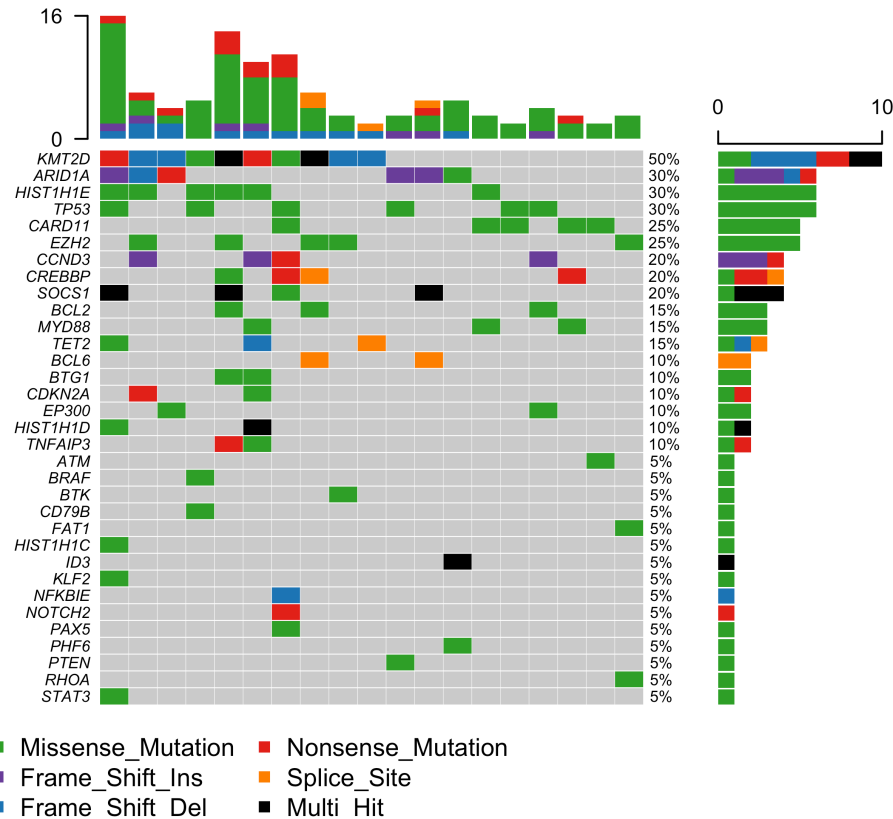

**Figure S10. Oncoplot showing the most frequently mutated genes identified in Follicular lymphoma (FL) patients present within the validation cohort.** Mutations were identified in 29 of the 34 FL patients included within the final validation cohort of 270 samples. Each column represents one patient while each row represents the absence (grey) or presence (colour) of a mutation within the defined gene in each sample. Mutations are color-coded by mutation nomenclature using the key located at the bottom of the figure. Percentages indicate number of samples identified with a mutation of the defined gene. The top barplot has the number of mutations identified in each patient. The right-hand barplot provides the number of mutations in the defined gene which are coloured by mutation nomenclature.

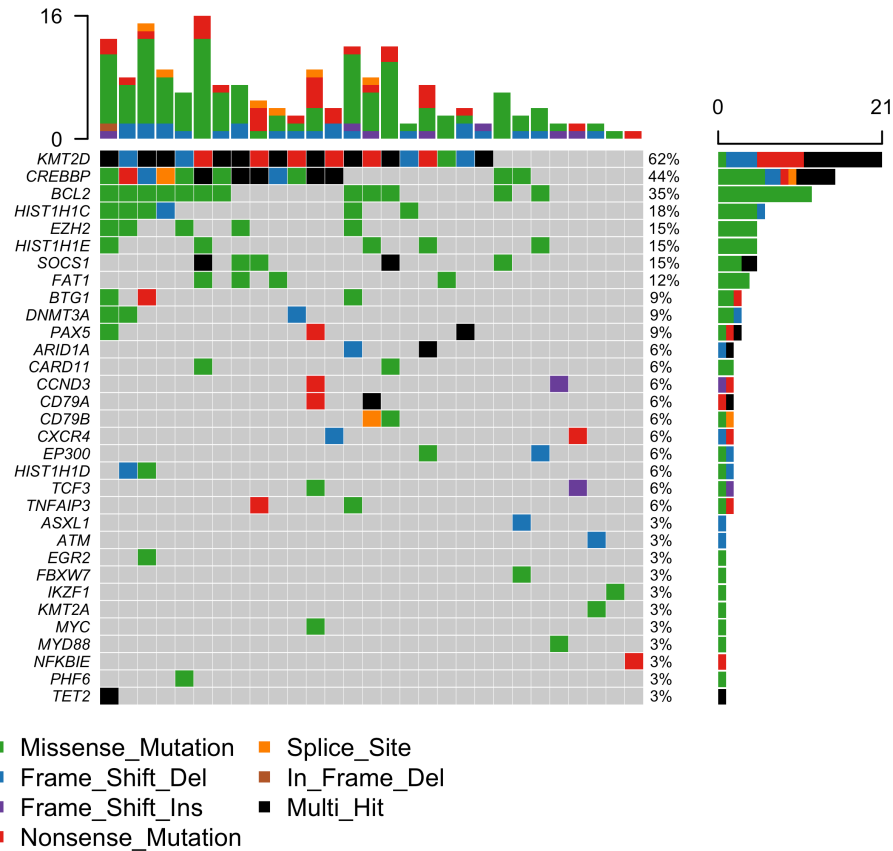

**Figure S11. Oncoplot showing the most frequently mutated genes identified in Mantle Cell Lymphoma (MCL) patients present within the validation cohort.** Mutations were identified in 29 of the 35 MCL patients included within the final validation cohort of 270 samples. Each column represents one patient while each row represents the absence (grey) or presence (colour) of a mutation within the defined gene in each sample. Mutations are color-coded by mutation nomenclature using the key located at the bottom of the figure. Percentages indicate number of samples identified with a mutation of the defined gene. The top barplot has the number of mutations identified in each patient. The right-hand barplot provides the number of mutations in the defined gene which are coloured by mutation nomenclature.

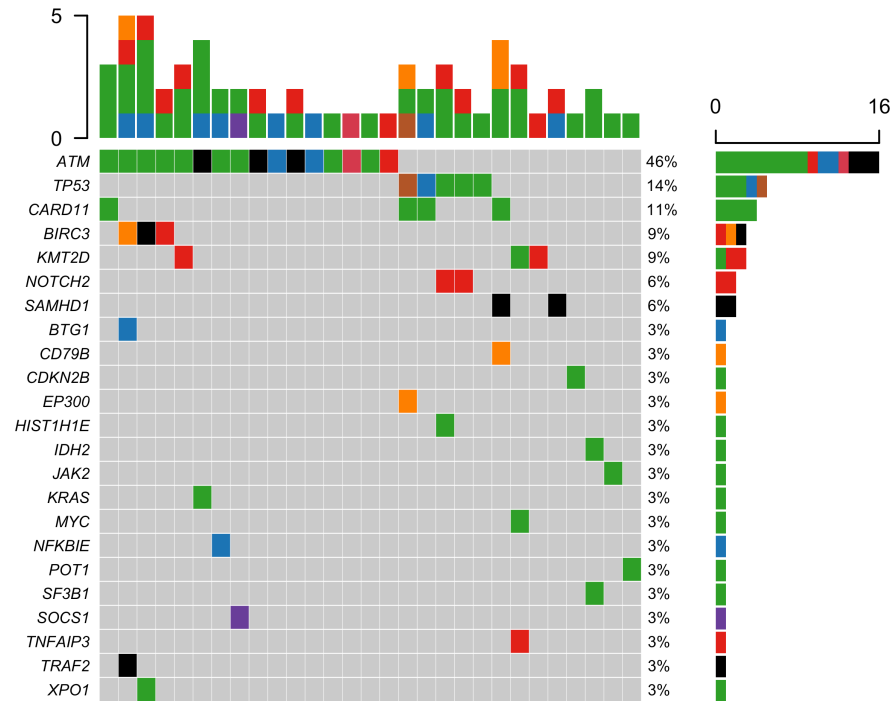

- Missense\_Mutation
- Nonsense\_Mutation
- Frame\_Shift\_Del
- Splice\_Site
- Frame\_Shift\_Ins
- In\_Frame\_Ins
- In\_Frame\_Del
- Multi\_Hit

**Figure S12. Oncoplot showing the most frequently mutated genes identified in Plasma Cell Myeloma (PCM) patients present within the validation cohort.** Mutations were identified in 22 of the 24 T-ALL patients included within the final validation cohort of 270 samples. Each column represents one patient while each row represents the absence (grey) or presence (colour) of a mutation within the defined gene in each sample. Mutations are color-coded by mutation nomenclature using the key located at the bottom of the figure. Percentages indicate number of samples identified with a mutation of the defined gene. The top barplot has the number of mutations identified in each patient. The right-hand barplot provides the number of mutations in the defined gene which are coloured by mutation nomenclature.

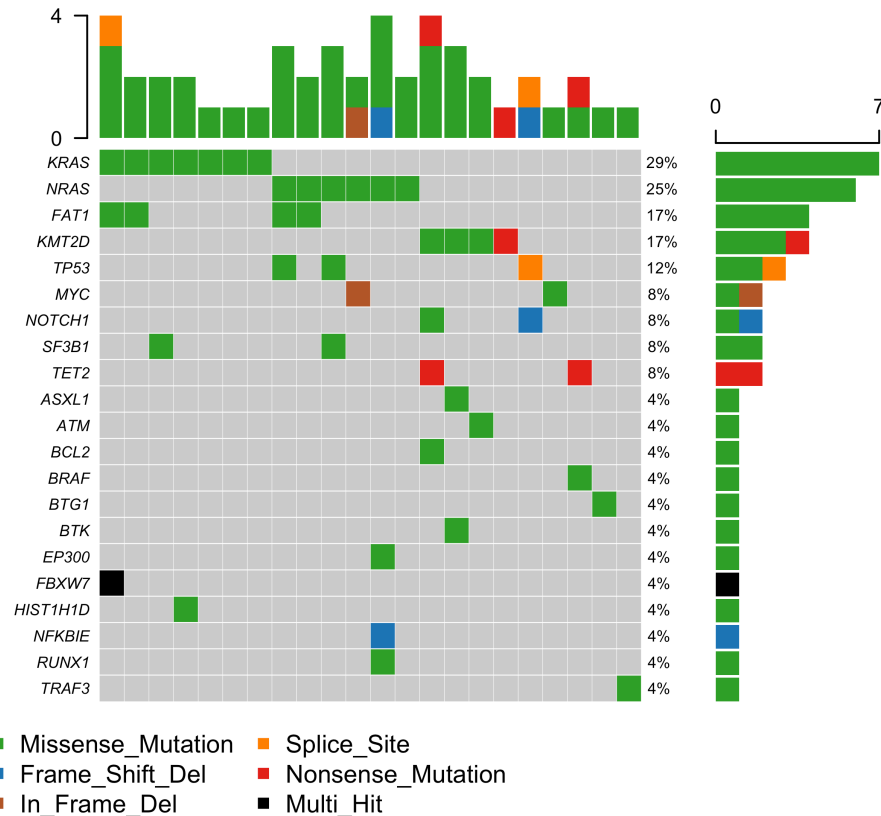

**Figure S13. Oncoplot showing the most frequently mutated genes identified in T Acute Lymphoblastic Leukemia (T-ALL) patients present within the validation cohort.** Mutations were identified in 37 of the 40 T-ALL patients included within the final validation cohort of 270 samples. Each column represents one patient while each row represents the absence (grey) or presence (colour) of a mutation within the defined gene in each sample. Mutations are color-coded by mutation nomenclature using the key located at the bottom of the figure. Percentages indicate number of samples identified with a mutation of the defined gene. The top barplot has the number of mutations identified in each patient. The right-hand barplot provides the number of mutations in the defined gene which are coloured by mutation nomenclature.

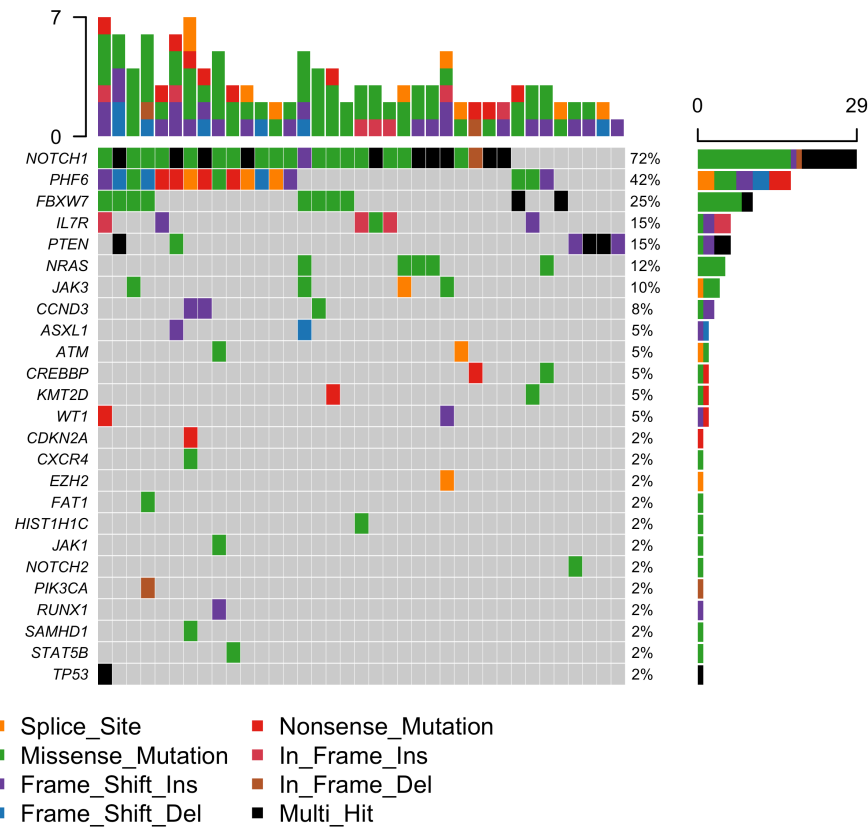

Supplement: advancesADV2020004056-suppl1.pdf [file advancesADV2020004056-suppl1.pdf]
